# Supplementary material
Source: publisher figshare collection journal article supplement (https://future-science-group.figshare.com/ndownloader/files/30640425)
Supplement: Supplementary file 1 [file 30640425]

## Sheet: Table S3
ID	corr	pvalue
KIM_MYCL1_AMPLIFICATION_TARGETS_DN	0.411101	0
BIOCARTA_AKAP95_PATHWAY	0.360557	5.55112e-15
BOYERINAS_ONCOFETAL_TARGETS_OF_LET7A1	0.359036	7.32747e-15
MANN_RESPONSE_TO_AMIFOSTINE_DN	0.355119	1.4877e-14
BOYAULT_LIVER_CANCER_SUBCLASS_G23_UP	0.354786	1.59872e-14
GREENBAUM_E2A_TARGETS_UP	0.354663	1.62093e-14
WHITFIELD_CELL_CYCLE_G2_M	0.351697	2.75335e-14
WILCOX_RESPONSE_TO_PROGESTERONE_UP	0.351211	3.01981e-14
ODONNELL_TFRC_TARGETS_DN	0.350577	3.37508e-14
FISCHER_G2_M_CELL_CYCLE	0.349468	4.10783e-14
GLINSKY_CANCER_DEATH_UP	0.34825	5.10703e-14
ZHENG_GLIOBLASTOMA_PLASTICITY_UP	0.346581	6.83897e-14
MITSIADES_RESPONSE_TO_APLIDIN_DN	0.346117	7.41629e-14
REACTOME_POST_TRANSLATIONAL_PROTEIN_MODIFICATION	0.346065	7.4829e-14
PID_PLK1_PATHWAY	0.344007	1.07248e-13
REACTOME_MITOTIC_TELOPHASE_CYTOKINESIS	0.342598	1.37002e-13
REICHERT_MITOSIS_LIN9_TARGETS	0.342416	1.4122e-13
HORIUCHI_WTAP_TARGETS_DN	0.341764	1.58096e-13
FLORIO_NEOCORTEX_BASAL_RADIAL_GLIA_DN	0.34165	1.61204e-13
LI_WILMS_TUMOR_ANAPLASTIC_UP	0.338514	2.76446e-13
STEIN_ESR1_TARGETS	0.338103	2.96652e-13
REACTOME_RESOLUTION_OF_SISTER_CHROMATID_COHESION	0.338024	3.00648e-13
SU_TESTIS	0.338011	3.01092e-13
VANTVEER_BREAST_CANCER_METASTASIS_DN	0.337313	3.39284e-13
SCIBETTA_KDM5B_TARGETS_DN	0.337172	3.47278e-13
MONTERO_THYROID_CANCER_POOR_SURVIVAL_UP	0.336905	3.63487e-13
MARTINEZ_RESPONSE_TO_TRABECTEDIN_DN	0.336797	3.7037e-13
REACTOME_ESTABLISHMENT_OF_SISTER_CHROMATID_COHESION	0.336461	3.91909e-13
VILLANUEVA_LIVER_CANCER_KRT19_UP	0.336347	3.9968e-13
LEE_EARLY_T_LYMPHOCYTE_UP	0.336214	4.08562e-13
MOHANKUMAR_HOXA1_TARGETS_UP	0.335552	4.56968e-13
PUJANA_BREAST_CANCER_LIT_INT_NETWORK	0.335506	4.60521e-13
PID_AURORA_B_PATHWAY	0.33523	4.82725e-13
REACTOME_ACTIVATION_OF_NIMA_KINASES_NEK9_NEK6_NEK7	0.334126	5.81091e-13
GEORGES_CELL_CYCLE_MIR192_TARGETS	0.333808	6.13065e-13
KEGG_OOCYTE_MEIOSIS	0.333575	6.3749e-13
PID_FOXM1_PATHWAY	0.333219	6.76792e-13
CHIANG_LIVER_CANCER_SUBCLASS_PROLIFERATION_UP	0.333201	6.78568e-13
SHEPARD_CRUSH_AND_BURN_MUTANT_DN	0.333178	6.81233e-13
WEST_ADRENOCORTICAL_TUMOR_UP	0.332995	7.02549e-13
FUJII_YBX1_TARGETS_DN	0.332088	8.17568e-13
REACTOME_RHO_GTPASES_ACTIVATE_FORMINS	0.330882	9.99201e-13
SERVITJA_LIVER_HNF1A_TARGETS_UP	0.330852	1.00409e-12
EPPERT_PROGENITOR	0.330104	1.13642e-12
SHEPARD_BMYB_TARGETS	0.329665	1.22213e-12
KONG_E2F3_TARGETS	0.329204	1.31894e-12
FURUKAWA_DUSP6_TARGETS_PCI35_DN	0.329175	1.32516e-12
FINETTI_BREAST_CANCER_KINOME_RED	0.329167	1.32694e-12
REACTOME_CONDENSATION_OF_PROMETAPHASE_CHROMOSOMES	0.329125	1.33626e-12
MOLENAAR_TARGETS_OF_CCND1_AND_CDK4_DN	0.32874	1.42375e-12
BIDUS_METASTASIS_UP	0.328623	1.45151e-12
SHEDDEN_LUNG_CANCER_POOR_SURVIVAL_A6	0.328548	1.46949e-12
SEMBA_FHIT_TARGETS_DN	0.32813	1.57385e-12
RODRIGUES_THYROID_CARCINOMA_ANAPLASTIC_UP	0.327861	1.64535e-12
BENPORATH_CYCLING_GENES	0.32639	2.09344e-12
NAKAYAMA_SOFT_TISSUE_TUMORS_PCA2_UP	0.326383	2.09566e-12
ODONNELL_TARGETS_OF_MYC_AND_TFRC_DN	0.325796	2.30638e-12
REACTOME_RHO_GTPASE_EFFECTORS	0.325037	2.60947e-12
REACTOME_POLO_LIKE_KINASE_MEDIATED_EVENTS	0.324938	2.65166e-12
WHITFIELD_CELL_CYCLE_G2	0.324828	2.69962e-12
SHEPARD_BMYB_MORPHOLINO_DN	0.323918	3.12861e-12
MARKEY_RB1_ACUTE_LOF_UP	0.323228	3.49809e-12
REACTOME_MITOTIC_SPINDLE_CHECKPOINT	0.322859	3.71259e-12
GAVIN_FOXP3_TARGETS_CLUSTER_P6	0.322828	3.73079e-12
TANG_SENESCENCE_TP53_TARGETS_DN	0.322757	3.77365e-12
KANG_DOXORUBICIN_RESISTANCE_UP	0.322742	3.7832e-12
EGUCHI_CELL_CYCLE_RB1_TARGETS	0.322725	3.79319e-12
KINSEY_TARGETS_OF_EWSR1_FLII_FUSION_UP	0.322698	3.80984e-12
SMID_BREAST_CANCER_BASAL_UP	0.322586	3.87934e-12
SARRIO_EPITHELIAL_MESENCHYMAL_TRANSITION_UP	0.322487	3.94174e-12
XU_HGF_SIGNALING_NOT_VIA_AKT1_48HR_DN	0.322432	3.97637e-12
REACTOME_CELL_CYCLE_CHECKPOINTS	0.321948	4.29878e-12
JI_RESPONSE_TO_FSH_DN	0.321813	4.39249e-12
YU_MYC_TARGETS_UP	0.321693	4.47864e-12
RODRIGUES_THYROID_CARCINOMA_POORLY_DIFFERENTIATED_UP	0.321633	4.52149e-12
DUTERTRE_ESTRADIOL_RESPONSE_24HR_UP	0.321458	4.65028e-12
REACTOME_E2F_MEDIATED_REGULATION_OF_DNA_REPLICATION	0.320931	5.05995e-12
BLUM_RESPONSE_TO_SALIRASIB_DN	0.320782	5.18185e-12
ZHAN_MULTIPLE_MYELOMA_PR_UP	0.320745	5.21272e-12
BHATI_G2M_ARREST_BY_2METHOXYESTRADIOL_UP	0.320656	5.28733e-12
WHITFIELD_CELL_CYCLE_LITERATURE	0.320419	5.49205e-12
FEVR_CTNNB1_TARGETS_DN	0.319627	6.23102e-12
WINNEPENNINCKX_MELANOMA_METASTASIS_UP	0.319027	6.85496e-12
FISCHER_G1_S_CELL_CYCLE	0.318926	6.96643e-12
REACTOME_E2F_ENABLED_INHIBITION_OF_PRE_REPLICATION_COMPLEX_FORMATION	0.318894	7.00151e-12
AFFAR_YY1_TARGETS_DN	0.318811	7.09499e-12
BENPORATH_ES_1	0.318781	7.12874e-12
REACTOME_MITOTIC_PROMETAPHASE	0.318764	7.14806e-12
ROSTY_CERVICAL_CANCER_PROLIFERATION_CLUSTER	0.318686	7.23688e-12
MISSIAGLIA_REGULATED_BY_METHYLATION_DN	0.318561	7.38165e-12
WU_APOPTOSIS_BY_CDKN1A_VIA_TP53	0.318354	7.62856e-12
FARMER_BREAST_CANCER_CLUSTER_2	0.317977	8.09752e-12
KAMMINGA_EZH2_TARGETS	0.317821	8.30047e-12
CROSBY_E2F4_TARGETS	0.317697	8.46434e-12
REACTOME_MITOTIC_METAPHASE_AND_ANAPHASE	0.317218	9.1307e-12
REACTOME_CELL_CYCLE	0.317042	9.38649e-12
ZHANG_BREAST_CANCER_PROGENITORS_UP	0.316872	9.64251e-12
REACTOME_CELL_CYCLE_MITOTIC	0.316651	9.98446e-12
LEE_LIVER_CANCER_SURVIVAL_DN	0.31623	1.06675e-11
JEON_SMAD6_TARGETS_DN	0.316003	1.10558e-11
LE_EGR2_TARGETS_UP	0.315582	1.18114e-11
KUMAMOTO_RESPONSE_TO_NUTLIN_3A_DN	0.315307	1.23315e-11
REACTOME_G2_M_DNA_REPLICATION_CHECKPOINT	0.315284	1.23763e-11
LINDGREN_BLADDER_CANCER_CLUSTER_3_UP	0.315201	1.25386e-11
CASORELLI_ACUTE_PROMYELOCYTIC_LEUKEMIA_DN	0.315103	1.27325e-11
HOFFMANN_LARGE_TO_SMALL_PRE_BII_LYMPHOCYTE_UP	0.314736	1.34839e-11
BENPORATH_PROLIFERATION	0.314518	1.39533e-11
REACTOME_M_PHASE	0.314216	1.46274e-11
GRAHAM_CML_DIVIDING_VS_NORMAL_QUIESCENT_UP	0.314002	1.5123e-11
SMID_BREAST_CANCER_LUMINAL_A_DN	0.313933	1.52873e-11
REACTOME_PROCESSING_OF_DNA_DOUBLE_STRAND_BREAK_ENDS	0.313778	1.56604e-11
RUIZ_TNC_TARGETS_DN	0.313636	1.60114e-11
FOURNIER_ACINAR_DEVELOPMENT_LATE_DN	0.313491	1.63758e-11
ZHOU_CELL_CYCLE_GENES_IN_IR_RESPONSE_24HR	0.313457	1.64646e-11
JOHANSSON_BRAIN_CANCER_EARLY_VS_LATE_UP	0.313205	1.71205e-11
REACTOME_G1_S_SPECIFIC_TRANSCRIPTION	0.312969	1.77611e-11
KOBAYASHI_EGFR_SIGNALING_24HR_DN	0.312355	1.95364e-11
REACTOME_G2_M_CHECKPOINTS	0.312307	1.96816e-11
GRAHAM_NORMAL_QUIESCENT_VS_NORMAL_DIVIDING_DN	0.312303	1.96969e-11
ISHIDA_E2F_TARGETS	0.311866	2.1076e-11
WU_APOPTOSIS_BY_CDKN1A_NOT_VIA_TP53	0.311857	2.11042e-11
REACTOME_MASTL_FACILITATES_MITOTIC_PROGRESSION	0.311506	2.22791e-11
REACTOME_DNA_DOUBLE_STRAND_BREAK_REPAIR	0.31096	2.42388e-11
PETROVA_PROX1_TARGETS_UP	0.310937	2.43272e-11
NUYTTEN_EZH2_TARGETS_DN	0.310916	2.44036e-11
VANTVEER_BREAST_CANCER_POOR_PROGNOSIS	0.310708	2.51994e-11
BURTON_ADIPOGENESIS_3	0.310549	2.5826e-11
GOBERT_OLIGODENDROCYTE_DIFFERENTIATION_UP	0.310398	2.64331e-11
REN_BOUND_BY_E2F	0.310054	2.78675e-11
STEIN_ESRRA_TARGETS_RESPONSIVE_TO_ESTROGEN_DN	0.309904	2.85172e-11
BENPORATH_NANOG_TARGETS	0.309866	2.86857e-11
LY_AGING_MIDDLE_DN	0.309793	2.90088e-11
MORI_MATURE_B_LYMPHOCYTE_DN	0.309625	2.97655e-11
NUYTTEN_NIPP1_TARGETS_DN	0.309613	2.98201e-11
LIANG_SILENCED_BY_METHYLATION_DN	0.309556	3.00835e-11
FERREIRA_EWINGS_SARCOMA_UNSTABLE_VS_STABLE_UP	0.308722	3.41809e-11
KEGG_CELL_CYCLE	0.308678	3.44103e-11
LI_WILMS_TUMOR_VS_FETAL_KIDNEY_1_DN	0.308627	3.46794e-11
GEORGES_TARGETS_OF_MIR192_AND_MIR215	0.30857	3.4982e-11
CHICAS_RB1_TARGETS_GROWING	0.30838	3.60139e-11
KAUFFMANN_MELANOMA_RELAPSE_UP	0.307792	3.93929e-11
MORI_IMMATURE_B_LYMPHOCYTE_DN	0.30744	4.15623e-11
ZHOU_CELL_CYCLE_GENES_IN_IR_RESPONSE_2HR	0.307326	4.22933e-11
TURASHVILI_BREAST_DUCTAL_CARCINOMA_VS_LOBULAR_NORMAL_UP	0.306598	4.72355e-11
SOTIRIOU_BREAST_CANCER_GRADE_1_VS_3_UP	0.306517	4.78193e-11
SONG_TARGETS_OF_IE86_CMV_PROTEIN	0.306137	5.06541e-11
MARKEY_RB1_CHRONIC_LOF_UP	0.306005	5.16716e-11
REACTOME_G2_M_DNA_DAMAGE_CHECKPOINT	0.305782	5.34515e-11
PID_ATR_PATHWAY	0.305582	5.50866e-11
REACTOME_CYCLIN_A_B1_B2_ASSOCIATED_EVENTS_DURING_G2_M_TRANSITION	0.305377	5.6825e-11
NADERI_BREAST_CANCER_PROGNOSIS_UP	0.305276	5.76899e-11
REACTOME_HOMOLOGY_DIRECTED_REPAIR	0.305162	5.86908e-11
YAMAZAKI_TCEB3_TARGETS_DN	0.305083	5.93987e-11
REACTOME_TRANSCRIPTIONAL_REGULATION_BY_E2F6	0.304831	6.16964e-11
CROONQUIST_NRAS_SIGNALING_DN	0.304591	6.39688e-11
FARMER_BREAST_CANCER_BASAL_VS_LULMINAL	0.304274	6.70894e-11
REACTOME_RESOLUTION_OF_D_LOOP_STRUCTURES_THROUGH_SYNTHESIS_DEPENDENT_STRAND_ANNEALING_SDSA	0.304103	6.88449e-11
MORI_EMU_MYC_LYMPHOMA_BY_ONSET_TIME_UP	0.304015	6.97566e-11
FOURNIER_ACINAR_DEVELOPMENT_LATE_2	0.303983	7.00928e-11
CROONQUIST_IL6_DEPRIVATION_DN	0.303938	7.05687e-11
CAFFAREL_RESPONSE_TO_THC_8HR_5_DN	0.303652	7.36602e-11
NAKAMURA_TUMOR_ZONE_PERIPHERAL_VS_CENTRAL_UP	0.303222	7.85649e-11
GAJATE_RESPONSE_TO_TRABECTEDIN_DN	0.302952	8.18006e-11
ZHOU_CELL_CYCLE_GENES_IN_IR_RESPONSE_6HR	0.302861	8.29301e-11
NAKAMURA_CANCER_MICROENVIRONMENT_DN	0.302646	8.56293e-11
REACTOME_MISMATCH_REPAIR	0.302203	9.14855e-11
FISCHER_DREAM_TARGETS	0.301583	1.00336e-10
DUTERTRE_ESTRADIOL_RESPONSE_6HR_UP	0.301363	1.03684e-10
REACTOME_HDR_THROUGH_SINGLE_STRAND_ANNEALING_SSA	0.301154	1.06945e-10
OHASHI_AURKB_TARGETS	0.300814	1.1249e-10
CHEMNITZ_RESPONSE_TO_PROSTAGLANDIN_E2_UP	0.300718	1.14099e-10
REACTOME_LEADING_STRAND_SYNTHESIS	0.300238	1.22508e-10
WANG_THOC1_TARGETS_UP	0.300165	1.23838e-10
MATHEW_FANCONI_ANEMIA_GENES	0.300104	1.24966e-10
OLSSON_E2F3_TARGETS_DN	0.299867	1.29431e-10
BERENJENO_TRANSFORMED_BY_RHOA_UP	0.299602	1.34587e-10
PUJANA_XPRSS_INT_NETWORK	0.299541	1.35805e-10
BASAKI_YBX1_TARGETS_UP	0.29937	1.39285e-10
SENGUPTA_NASOPHARYNGEAL_CARCINOMA_UP	0.299258	1.41611e-10
WHITEFORD_PEDIATRIC_CANCER_MARKERS	0.299182	1.43195e-10
MEINHOLD_OVARIAN_CANCER_LOW_GRADE_DN	0.298928	1.4866e-10
MORI_LARGE_PRE_BII_LYMPHOCYTE_UP	0.2989	1.4927e-10
DODD_NASOPHARYNGEAL_CARCINOMA_DN	0.298843	1.50542e-10
REACTOME_GOLGI_TO_ER_RETROGRADE_TRANSPORT	0.298791	1.51692e-10
DORMOY_ELAVL1_TARGETS	0.29877	1.52164e-10
PID_E2F_PATHWAY	0.298474	1.58922e-10
REACTOME_HOMOLOGOUS_DNA_PAIRING_AND_STRAND_EXCHANGE	0.298417	1.60282e-10
KEGG_PROGESTERONE_MEDIATED_OOCYTE_MATURATION	0.298255	1.64129e-10
BOYAULT_LIVER_CANCER_SUBCLASS_G3_UP	0.29823	1.64742e-10
GRAESSMANN_APOPTOSIS_BY_DOXORUBICIN_DN	0.298104	1.67826e-10
ACEVEDO_LIVER_CANCER_WITH_H3K9ME3_DN	0.297997	1.70467e-10
LY_AGING_OLD_DN	0.297952	1.71603e-10
PUJANA_BRCA_CENTERED_NETWORK	0.297917	1.72487e-10
KIM_WT1_TARGETS_DN	0.297672	1.78799e-10
BIOCARTA_EIF2_PATHWAY	0.297602	1.80625e-10
HONRADO_BREAST_CANCER_BRCA1_VS_BRCA2	0.297535	1.8243e-10
YU_BAP1_TARGETS	0.297278	1.89425e-10
REACTOME_SUMOYLATION	0.295683	2.39057e-10
REACTOME_ACTIVATION_OF_THE_PRE_REPLICATIVE_COMPLEX	0.295668	2.39571e-10
JOHNSTONE_PARVB_TARGETS_3_DN	0.295663	2.39758e-10
REACTOME_G2_PHASE	0.295587	2.42399e-10
BENPORATH_SOX2_TARGETS	0.295538	2.4415e-10
SASAKI_ADULT_T_CELL_LEUKEMIA	0.295493	2.45762e-10
YANG_BCL3_TARGETS_UP	0.295423	2.48269e-10
REACTOME_ACTIVATION_OF_ATR_IN_RESPONSE_TO_REPLICATION_STRESS	0.295335	2.5145e-10
REACTOME_GOLGI_CISTERNAE_PERICENTRIOLAR_STACK_REORGANIZATION	0.29531	2.52376e-10
KEGG_MISMATCH_REPAIR	0.295288	2.53193e-10
REACTOME_DNA_STRAND_ELONGATION	0.295031	2.62815e-10
SUNG_METASTASIS_STROMA_DN	0.294587	2.80282e-10
RHODES_UNDIFFERENTIATED_CANCER	0.294534	2.82436e-10
MCCOLLUM_GELDANAMYCIN_RESISTANCE_DN	0.294399	2.87997e-10
WEST_ADRENOCORTICAL_TUMOR_MARKERS_UP	0.294349	2.90088e-10
REACTOME_MITOTIC_G1_G1_S_PHASES	0.294195	2.96655e-10
BIOCARTA_CELLCYCLE_PATHWAY	0.293947	3.07468e-10
WANG_CISPLATIN_RESPONSE_AND_XPC_UP	0.293465	3.29631e-10
VERNELL_RETINOBLASTOMA_PATHWAY_UP	0.29306	3.49419e-10
GRAHAM_CML_QUIESCENT_VS_NORMAL_QUIESCENT_UP	0.292917	3.56688e-10
REACTOME_CHK1_CHK2_CDS1_MEDIATED_INACTIVATION_OF_CYCLIN_B:CDK1_COMPLEX	0.292678	3.69186e-10
REACTOME_PHOSPHORYLATION_OF_EMI1	0.292627	3.7187e-10
WANG_SMARCE1_TARGETS_DN	0.292581	3.7433e-10
REICHERT_G1S_REGULATORS_AS_PI3K_TARGETS	0.291994	4.0729e-10
SA_G2_AND_M_PHASES	0.291863	4.14987e-10
REACTOME_LAGGING_STRAND_SYNTHESIS	0.291702	4.24679e-10
REACTOME_G0_AND_EARLY_G1	0.291531	4.35194e-10
FRASOR_RESPONSE_TO_SERM_OR_FULVESTRANT_DN	0.291475	4.3868e-10
PATIL_LIVER_CANCER	0.291344	4.46981e-10
REACTOME_CHROMOSOME_MAINTENANCE	0.291135	4.60532e-10
JAEGER_METASTASIS_UP	0.291118	4.61656e-10
ZERBINI_RESPONSE_TO_SULINDAC_DN	0.2907	4.9006e-10
MARSON_BOUND_BY_E2F4_UNSTIMULATED	0.290658	4.93046e-10
PUJANA_BRCA2_PCC_NETWORK	0.290496	5.04524e-10
PUIFFE_INVASION_INHIBITED_BY_ASCITES_UP	0.29032	5.17335e-10
REACTOME_SIGNALING_BY_RHO_GTPASES	0.289279	5.99854e-10
REACTOME_CDC6_ASSOCIATION_WITH_THE_ORC:ORIGIN_COMPLEX	0.289127	6.12924e-10
REACTOME_INHIBITION_OF_REPLICATION_INITIATION_OF_DAMAGED_DNA_BY_RB1_E2F1	0.288729	6.48475e-10
RIZ_ERYTHROID_DIFFERENTIATION	0.288528	6.67262e-10
OUELLET_CULTURED_OVARIAN_CANCER_INVASIVE_VS_LMP_UP	0.28846	6.73644e-10
ABRAMSON_INTERACT_WITH_AIRE	0.288299	6.89217e-10
REACTOME_MITOTIC_G2_G2_M_PHASES	0.28768	7.52097e-10
PUJANA_BREAST_CANCER_WITH_BRCA1_MUTATED_UP	0.287625	7.57971e-10
WANG_RESPONSE_TO_GSK3_INHIBITOR_SB216763_DN	0.287368	7.85959e-10
REACTOME_S_PHASE	0.287326	7.90618e-10
REACTOME_ACTIVATED_NTRK3_SIGNALS_THROUGH_RAS	0.287317	7.91542e-10
REACTOME_DISEASES_OF_MISMATCH_REPAIR_MMR	0.287145	8.10951e-10
REACTOME_KINESINS	0.287093	8.16903e-10
CAFFAREL_RESPONSE_TO_THC_DN	0.287011	8.264e-10
BIOCARTA_CDC25_PATHWAY	0.286836	8.47037e-10
REACTOME_UNWINDING_OF_DNA	0.286473	8.91265e-10
CONRAD_STEM_CELL	0.286334	9.08886e-10
WEBER_METHYLATED_ICP_IN_FIBROBLAST	0.286157	9.3162e-10
BIOCARTA_RANMS_PATHWAY	0.286115	9.37217e-10
GARCIA_TARGETS_OF_FLI1_AND_DAX1_DN	0.286025	9.49067e-10
BIOCARTA_MCM_PATHWAY	0.285721	9.90322e-10
WILLIAMS_ESR1_TARGETS_UP	0.285555	1.01358e-09
BENPORATH_ES_2	0.285184	1.06744e-09
BILANGES_SERUM_SENSITIVE_VIA_TSC2	0.285095	1.08085e-09
BIOCARTA_BARD1_PATHWAY	0.285076	1.08369e-09
ENK_UV_RESPONSE_KERATINOCYTE_DN	0.284676	1.14585e-09
PUJANA_CHEK2_PCC_NETWORK	0.284604	1.1574e-09
SMID_BREAST_CANCER_RELAPSE_IN_LUNG_UP	0.284562	1.1643e-09
ZHU_SKIL_TARGETS_DN	0.284439	1.18438e-09
BORCZUK_MALIGNANT_MESOTHELIOMA_UP	0.284294	1.2085e-09
TIEN_INTESTINE_PROBIOTICS_24HR_UP	0.284212	1.22229e-09
LOPEZ_MESOTELIOMA_SURVIVAL_TIME_UP	0.28414	1.23469e-09
MULLIGHAN_NPM1_MUTATED_SIGNATURE_2_UP	0.283915	1.27392e-09
GENTILE_RESPONSE_CLUSTER_D3	0.283651	1.32144e-09
REACTOME_DNA_REPLICATION_INITIATION	0.283499	1.34958e-09
PID_BARD1_PATHWAY	0.283235	1.39984e-09
REACTOME_NUCLEAR_PORE_COMPLEX_NPC_DISASSEMBLY	0.283132	1.41992e-09
TARTE_PLASMA_CELL_VS_PLASMABLAST_DN	0.282843	1.47784e-09
REACTOME_SUMOYLATION_OF_DNA_REPLICATION_PROTEINS	0.282571	1.53461e-09
REACTOME_TELOMERE_C_STRAND_LAGGING_STRAND_SYNTHESIS	0.28241	1.56898e-09
VECCHI_GASTRIC_CANCER_EARLY_UP	0.282172	1.62155e-09
SIMBULAN_PARP1_TARGETS_DN	0.282169	1.62219e-09
TOYOTA_TARGETS_OF_MIR34B_AND_MIR34C	0.282034	1.65275e-09
FIGUEROA_AML_METHYLATION_CLUSTER_6_UP	0.281948	1.6724e-09
WANG_METASTASIS_OF_BREAST_CANCER_ESR1_UP	0.281934	1.67562e-09
PID_FANCONI_PATHWAY	0.281838	1.69796e-09
KALMA_E2F1_TARGETS	0.281748	1.71903e-09
HATADA_METHYLATED_IN_LUNG_CANCER_DN	0.281746	1.71951e-09
CHOW_RASSF1_TARGETS_UP	0.281627	1.74783e-09
REACTOME_PROCESSIVE_SYNTHESIS_ON_THE_LAGGING_STRAND	0.281207	1.85198e-09
WINTER_HYPOXIA_UP	0.28055	2.02675e-09
REACTOME_INTRA_GOLGI_AND_RETROGRADE_GOLGI_TO_ER_TRAFFIC	0.280381	2.07403e-09
DITTMER_PTHLH_TARGETS_UP	0.280336	2.08695e-09
BOYAULT_LIVER_CANCER_SUBCLASS_G123_UP	0.280189	2.12934e-09
REACTOME_HDR_THROUGH_HOMOLOGOUS_RECOMBINATION_HRR	0.279965	2.19549e-09
RHEIN_ALL_GLUCOCORTICOID_THERAPY_DN	0.279775	2.25347e-09
UDAYAKUMAR_MED1_TARGETS_UP	0.279489	2.34311e-09
LEE_BMP2_TARGETS_DN	0.279293	2.40671e-09
REACTOME_MITOTIC_PROPHASE	0.279042	2.49053e-09
REACTOME_COPI_DEPENDENT_GOLGI_TO_ER_RETROGRADE_TRAFFIC	0.278829	2.56371e-09
BROWNE_HCMV_INFECTION_48HR_UP	0.278572	2.65496e-09
REACTOME_TRANSCRIPTION_OF_E2F_TARGETS_UNDER_NEGATIVE_CONTROL_BY_P107_RBL1_AND_P130_RBL2_IN_COMPLEX_WITH_HDAC1	0.27848	2.68837e-09
REACTOME_REGULATION_OF_TP53_ACTIVITY	0.27817	2.80404e-09
LIAO_HAVE_SOX4_BINDING_SITES	0.278091	2.83431e-09
FIGUEROA_AML_METHYLATION_CLUSTER_3_UP	0.277669	3.00112e-09
REACTOME_NUCLEAR_ENVELOPE_BREAKDOWN	0.277026	3.27399e-09
MORI_PRE_BI_LYMPHOCYTE_UP	0.276997	3.28702e-09
REACTOME_NUCLEAR_ENVELOPE_REASSEMBLY	0.276961	3.30306e-09
REACTOME_CELLULAR_RESPONSES_TO_STRESS	0.276945	3.30999e-09
REACTOME_REGULATION_OF_TP53_ACTIVITY_THROUGH_PHOSPHORYLATION	0.276729	3.40779e-09
PID_AURORA_A_PATHWAY	0.276195	3.66219e-09
GENTLES_LEUKEMIC_STEM_CELL_DN	0.27618	3.66964e-09
DELPUECH_FOXO3_TARGETS_DN	0.275978	3.77123e-09
PEDERSEN_METASTASIS_BY_ERBB2_ISOFORM_7	0.275873	3.8249e-09
ZHAN_MULTIPLE_MYELOMA_SUBGROUPS	0.275688	3.92092e-09
LY_AGING_PREMATURE_DN	0.275656	3.93768e-09
REACTOME_HDR_THROUGH_MMEJ_ALT_NHEJ	0.27542	4.06496e-09
REACTOME_PROTEIN_UBIQUITINATION	0.274984	4.30953e-09
FLOTHO_PEDIATRIC_ALL_THERAPY_RESPONSE_DN	0.274949	4.32978e-09
REACTOME_REGULATION_OF_PLK1_ACTIVITY_AT_G2_M_TRANSITION	0.274939	4.33565e-09
CHIARADONNA_NEOPLASTIC_TRANSFORMATION_KRAS_UP	0.274843	4.39173e-09
REACTOME_REGULATION_OF_TP53_EXPRESSION_AND_DEGRADATION	0.274525	4.58287e-09
CHEN_ETV5_TARGETS_TESTIS	0.274324	4.7074e-09
PID_ATM_PATHWAY	0.273638	5.15925e-09
HU_GENOTOXIC_DAMAGE_4HR	0.273478	5.27062e-09
REACTOME_NUCLEOSOME_ASSEMBLY	0.273108	5.53617e-09
GOLDRATH_ANTIGEN_RESPONSE	0.272377	6.10085e-09
KEGG_UBIQUITIN_MEDIATED_PROTEOLYSIS	0.27215	6.2873e-09
REACTOME_DEUBIQUITINATION	0.271629	6.73623e-09
REACTOME_DNA_REPLICATION	0.271582	6.77802e-09
REACTOME_SUMOYLATION_OF_DNA_DAMAGE_RESPONSE_AND_REPAIR_PROTEINS	0.271435	6.9108e-09
DAZARD_RESPONSE_TO_UV_SCC_DN	0.271084	7.23909e-09
REACTOME_TRANSLESION_SYNTHESIS_BY_POLH	0.270692	7.62306e-09
BENPORATH_ES_CORE_NINE	0.270659	7.65612e-09
KAUFFMANN_DNA_REPLICATION_GENES	0.270175	8.15963e-09
YANG_BREAST_CANCER_ESR1_LASER_DN	0.270079	8.26255e-09
REACTOME_RESOLUTION_OF_D_LOOP_STRUCTURES	0.269977	8.3742e-09
REACTOME_DNA_REPAIR	0.26977	8.60562e-09
BURTON_ADIPOGENESIS_PEAK_AT_24HR	0.269715	8.66714e-09
BUSA_SAM68_TARGETS_DN	0.269679	8.70854e-09
REACTOME_PROCESSING_AND_ACTIVATION_OF_SUMO	0.269564	8.8415e-09
CHUANG_OXIDATIVE_STRESS_RESPONSE_DN	0.269485	8.93293e-09
BHATTACHARYA_EMBRYONIC_STEM_CELL	0.269376	9.06092e-09
COURTOIS_SENESCENCE_TRIGGERS	0.26851	1.01481e-08
GARGALOVIC_RESPONSE_TO_OXIDIZED_PHOSPHOLIPIDS_TURQUOISE_DN	0.268209	1.05549e-08
ZHENG_IL22_SIGNALING_DN	0.268058	1.07645e-08
REACTOME_PHOSPHORYLATION_OF_THE_APC_C	0.267841	1.10736e-08
REACTOME_REGULATION_OF_MITOTIC_CELL_CYCLE	0.267556	1.14918e-08
BIOCARTA_MPR_PATHWAY	0.267443	1.1661e-08
REACTOME_APC_CDC20_MEDIATED_DEGRADATION_OF_NEK2A	0.267257	1.19467e-08
FERRANDO_HOX11_NEIGHBORS	0.267077	1.22288e-08
BIOCARTA_EFP_PATHWAY	0.266923	1.24764e-08
SA_REG_CASCADE_OF_CYCLIN_EXPR	0.26635	1.3438e-08
SCIAN_CELL_CYCLE_TARGETS_OF_TP53_AND_TP73_DN	0.26603	1.40054e-08
BENPORATH_ES_CORE_NINE_CORRELATED	0.265509	1.49786e-08
REACTOME_RECOGNITION_OF_DNA_DAMAGE_BY_PCNA_CONTAINING_REPLICATION_COMPLEX	0.265286	1.54155e-08
KAPOSI_LIVER_CANCER_MET_UP	0.265271	1.54452e-08
REACTOME_MISSPLICED_LRP5_MUTANTS_HAVE_ENHANCED_BETA_CATENIN_DEPENDENT_SIGNALING	0.265246	1.54961e-08
GHO_ATF5_TARGETS_UP	0.265181	1.56267e-08
CAIRO_HEPATOBLASTOMA_CLASSES_UP	0.265099	1.57925e-08
ONDER_CDH1_TARGETS_1_DN	0.264838	1.63312e-08
BIOCARTA_RB_PATHWAY	0.264563	1.69194e-08
PUJANA_BRCA1_PCC_NETWORK	0.264475	1.71111e-08
WONG_PROTEASOME_GENE_MODULE	0.264456	1.71527e-08
BIOCARTA_G1_PATHWAY	0.263904	1.84108e-08
GENTILE_UV_HIGH_DOSE_DN	0.263804	1.86488e-08
WHITFIELD_CELL_CYCLE_M_G1	0.263748	1.87819e-08
WEI_MYCN_TARGETS_WITH_E_BOX	0.263599	1.91453e-08
PETROVA_ENDOTHELIUM_LYMPHATIC_VS_BLOOD_UP	0.263514	1.93525e-08
REACTOME_DNA_REPLICATION_PRE_INITIATION	0.263135	2.03149e-08
NEMETH_INFLAMMATORY_RESPONSE_LPS_DN	0.262804	2.11892e-08
PEART_HDAC_PROLIFERATION_CLUSTER_UP	0.262312	2.25599e-08
CAFFAREL_RESPONSE_TO_THC_24HR_5_UP	0.261828	2.39944e-08
FIGUEROA_AML_METHYLATION_CLUSTER_7_UP	0.261554	2.48433e-08
REACTOME_DISORDERS_OF_TRANSMEMBRANE_TRANSPORTERS	0.261481	2.50729e-08
MANALO_HYPOXIA_DN	0.261205	2.59645e-08
REACTOME_EXTENSION_OF_TELOMERES	0.261178	2.60549e-08
WEBER_METHYLATED_ICP_IN_SPERM_DN	0.261009	2.66186e-08
IWANAGA_E2F1_TARGETS_NOT_INDUCED_BY_SERUM	0.260977	2.67265e-08
BIOCARTA_G2_PATHWAY	0.260777	2.74124e-08
KEGG_DNA_REPLICATION	0.260462	2.85231e-08
RAY_TUMORIGENESIS_BY_ERBB2_CDC25A_UP	0.260385	2.88024e-08
BROWNE_HCMV_INFECTION_2HR_DN	0.260098	2.98666e-08
REACTOME_AURKA_ACTIVATION_BY_TPX2	0.260039	3.00871e-08
IVANOVA_HEMATOPOIESIS_EARLY_PROGENITOR	0.259827	3.09016e-08
REACTOME_INHIBITION_OF_THE_PROTEOLYTIC_ACTIVITY_OF_APC_C_REQUIRED_FOR_THE_ONSET_OF_ANAPHASE_BY_MITOTIC_SPINDLE_CHECKPOINT_COMPONENTS	0.259736	3.12569e-08
REACTOME_SOS_MEDIATED_SIGNALLING	0.259688	3.14465e-08
REACTOME_MAPK6_MAPK4_SIGNALING	0.25957	3.19201e-08
BIOCARTA_SKP2E2F_PATHWAY	0.259446	3.24202e-08
KIM_WT1_TARGETS_8HR_DN	0.25943	3.24848e-08
KAUFFMANN_DNA_REPAIR_GENES	0.259245	3.3248e-08
REACTOME_DNA_DAMAGE_BYPASS	0.258946	3.45222e-08
BECKER_TAMOXIFEN_RESISTANCE_DN	0.258619	3.59647e-08
BIOCARTA_RACCYCD_PATHWAY	0.258516	3.6434e-08
MATZUK_MALE_REPRODUCTION_SERTOLI	0.258513	3.64459e-08
CUI_GLUCOSE_DEPRIVATION	0.258396	3.69865e-08
BOHN_PRIMARY_IMMUNODEFICIENCY_SYNDROM_UP	0.258017	3.87794e-08
REACTOME_ACTIVATION_OF_CASPASES_THROUGH_APOPTOSOME_MEDIATED_CLEAVAGE	0.257634	4.06803e-08
KARAKAS_TGFB1_SIGNALING	0.257527	4.12255e-08
REACTOME_GAP_FILLING_DNA_REPAIR_SYNTHESIS_AND_LIGATION_IN_GG_NER	0.257329	4.226e-08
JOHANSSON_GLIOMAGENESIS_BY_PDGFB_UP	0.257145	4.32395e-08
CROONQUIST_STROMAL_STIMULATION_DN	0.25697	4.41885e-08
GROSS_HYPOXIA_VIA_ELK3_UP	0.256861	4.47931e-08
LE_NEURONAL_DIFFERENTIATION_DN	0.256237	4.84047e-08
CHIARETTI_T_ALL_RELAPSE_PROGNOSIS	0.256106	4.91971e-08
WHITFIELD_CELL_CYCLE_S	0.255788	5.11765e-08
REACTOME_REGULATION_OF_HSF1_MEDIATED_HEAT_SHOCK_RESPONSE	0.255784	5.12012e-08
BIOCARTA_SRCRPTP_PATHWAY	0.255714	5.16472e-08
CHICAS_RB1_TARGETS_SENESCENT	0.255538	5.27814e-08
REACTOME_FACTORS_INVOLVED_IN_MEGAKARYOCYTE_DEVELOPMENT_AND_PLATELET_PRODUCTION	0.255458	5.33065e-08
DOANE_BREAST_CANCER_CLASSES_DN	0.255457	5.33148e-08
RAMALHO_STEMNESS_UP	0.255396	5.37194e-08
KUMAR_AUTOPHAGY_NETWORK	0.255271	5.45529e-08
CROONQUIST_NRAS_VS_STROMAL_STIMULATION_DN	0.254922	5.69579e-08
GARY_CD5_TARGETS_DN	0.254747	5.81988e-08
PYEON_CANCER_HEAD_AND_NECK_VS_CERVICAL_UP	0.254382	6.08732e-08
WANG_RECURRENT_LIVER_CANCER_UP	0.254066	6.32903e-08
SAKAI_TUMOR_INFILTRATING_MONOCYTES_DN	0.253424	6.84801e-08
TOMIDA_LUNG_CANCER_POOR_SURVIVAL	0.253254	6.99158e-08
GENTILE_UV_RESPONSE_CLUSTER_D5	0.253192	7.04477e-08
AUNG_GASTRIC_CANCER	0.252546	7.62422e-08
BIOCARTA_SAM68_PATHWAY	0.252535	7.63463e-08
REACTOME_SEROTONIN_RECEPTORS	0.25251	7.65806e-08
REACTOME_CELLULAR_RESPONSES_TO_EXTERNAL_STIMULI	0.252288	7.86879e-08
REACTOME_ORC1_REMOVAL_FROM_CHROMATIN	0.252214	7.93989e-08
SCHWAB_TARGETS_OF_BMYB_POLYMORPHIC_VARIANTS_UP	0.2516	8.55595e-08
REACTOME_SWITCHING_OF_ORIGINS_TO_A_POST_REPLICATIVE_STATE	0.251488	8.67396e-08
ZAMORA_NOS2_TARGETS_UP	0.251446	8.71836e-08
REACTOME_ACTIVATION_OF_APC_C_AND_APC_C:CDC20_MEDIATED_DEGRADATION_OF_MITOTIC_PROTEINS	0.251434	8.73025e-08
REACTOME_TELOMERE_MAINTENANCE	0.251397	8.77024e-08
MARKS_HDAC_TARGETS_DN	0.25138	8.78823e-08
REACTOME_ASSEMBLY_OF_THE_ORC_COMPLEX_AT_THE_ORIGIN_OF_REPLICATION	0.251332	8.83927e-08
REACTOME_CELLULAR_RESPONSE_TO_HEAT_STRESS	0.251193	8.98963e-08
AMIT_SERUM_RESPONSE_480_MCF10A	0.250976	9.23023e-08
GRYDER_PAX3FOXO1_ENHANCERS_IN_TADS	0.250439	9.85063e-08
REACTOME_TRANSCRIPTIONAL_REGULATION_BY_TP53	0.250273	1.00509e-07
BENPORATH_OCT4_TARGETS	0.250207	1.01311e-07
KUMAR_PATHOGEN_LOAD_BY_MACROPHAGES	0.250019	1.03645e-07
REACTOME_APC_C:CDC20_MEDIATED_DEGRADATION_OF_CYCLIN_B	0.249645	1.08425e-07
MUELLER_PLURINET	0.249552	1.09653e-07
PAL_PRMT5_TARGETS_UP	0.249471	1.1072e-07
WONG_EMBRYONIC_STEM_CELL_CORE	0.249186	1.14592e-07
GRYDER_PAX3FOXO1_TOP_ENHANCERS	0.248781	1.20321e-07
PID_P73PATHWAY	0.248653	1.22175e-07
ACEVEDO_LIVER_CANCER_WITH_H3K27ME3_DN	0.248357	1.26596e-07
REACTOME_TP53_REGULATES_TRANSCRIPTION_OF_GENES_INVOLVED_IN_G1_CELL_CYCLE_ARREST	0.248196	1.29073e-07
REACTOME_INTERACTIONS_OF_REV_WITH_HOST_CELLULAR_PROTEINS	0.248029	1.31676e-07
MULLIGHAN_NPM1_SIGNATURE_3_UP	0.248005	1.32058e-07
REACTOME_SUMOYLATION_OF_SUMOYLATION_PROTEINS	0.248001	1.32126e-07
IGARASHI_ATF4_TARGETS_DN	0.247745	1.36228e-07
REACTOME_ANTIGEN_PROCESSING:_UBIQUITINATION_PROTEASOME_DEGRADATION	0.24744	1.41291e-07
GARGALOVIC_RESPONSE_TO_OXIDIZED_PHOSPHOLIPIDS_RED_UP	0.247374	1.42403e-07
GOLDRATH_HOMEOSTATIC_PROLIFERATION	0.247133	1.4657e-07
BIOCARTA_P27_PATHWAY	0.246937	1.50026e-07
REACTOME_NUCLEAR_IMPORT_OF_REV_PROTEIN	0.246242	1.62974e-07
MOREAUX_B_LYMPHOCYTE_MATURATION_BY_TACI_DN	0.24596	1.6853e-07
STONER_ESOPHAGEAL_CARCINOGENESIS_UP	0.245949	1.68754e-07
LINDGREN_BLADDER_CANCER_CLUSTER_1_DN	0.245753	1.72721e-07
WANG_LMO4_TARGETS_DN	0.245505	1.77878e-07
REACTOME_EXPORT_OF_VIRAL_RIBONUCLEOPROTEINS_FROM_NUCLEUS	0.245416	1.79752e-07
IWANAGA_E2F1_TARGETS_INDUCED_BY_SERUM	0.245045	1.87838e-07
TIEN_INTESTINE_PROBIOTICS_6HR_DN	0.244932	1.90362e-07
REACTOME_TERMINATION_OF_TRANSLESION_DNA_SYNTHESIS	0.244616	1.97589e-07
STEIN_ESRRA_TARGETS_RESPONSIVE_TO_ESTROGEN_UP	0.244571	1.98644e-07
MAYBURD_RESPONSE_TO_L663536_DN	0.244505	2.00203e-07
REACTOME_PCNA_DEPENDENT_LONG_PATCH_BASE_EXCISION_REPAIR	0.244468	2.0107e-07
REACTOME_TRANSLESION_SYNTHESIS_BY_Y_FAMILY_DNA_POLYMERASES_BYPASSES_LESIONS_ON_DNA_TEMPLATE	0.244409	2.0247e-07
BRUECKNER_TARGETS_OF_MIRLET7A3_UP	0.244285	2.05454e-07
REACTOME_TRANSCRIPTION_OF_E2F_TARGETS_UNDER_NEGATIVE_CONTROL_BY_DREAM_COMPLEX	0.244251	2.06298e-07
REACTOME_RESOLUTION_OF_AP_SITES_VIA_THE_MULTIPLE_NUCLEOTIDE_PATCH_REPLACEMENT_PATHWAY	0.243993	2.12663e-07
GRADE_COLON_AND_RECTAL_CANCER_UP	0.243886	2.15354e-07
REACTOME_GLYCOLYSIS	0.243729	2.19358e-07
SMID_BREAST_CANCER_RELAPSE_IN_BRAIN_UP	0.243678	2.20682e-07
REACTOME_TP53_REGULATES_TRANSCRIPTION_OF_CELL_CYCLE_GENES	0.243561	2.23724e-07
HESS_TARGETS_OF_HOXA9_AND_MEIS1_UP	0.243435	2.27071e-07
REACTOME_ASSEMBLY_OF_THE_PRE_REPLICATIVE_COMPLEX	0.2434	2.27998e-07
CHIN_BREAST_CANCER_COPY_NUMBER_UP	0.242834	2.43657e-07
REACTOME_TRANSPORT_OF_THE_SLBP_DEPENDANT_MATURE_MRNA	0.242484	2.53841e-07
REACTOME_UB_SPECIFIC_PROCESSING_PROTEASES	0.24236	2.57558e-07
REACTOME_PENTOSE_PHOSPHATE_PATHWAY	0.242342	2.58097e-07
REACTOME_HOST_INTERACTIONS_WITH_INFLUENZA_FACTORS	0.242167	2.63427e-07
BIOCARTA_FBW7_PATHWAY	0.241766	2.7603e-07
ZHANG_RESPONSE_TO_IKK_INHIBITOR_AND_TNF_DN	0.241708	2.77914e-07
FIGUEROA_AML_METHYLATION_CLUSTER_4_UP	0.241511	2.84365e-07
REACTOME_CONDENSATION_OF_PROPHASE_CHROMOSOMES	0.241463	2.85952e-07
REACTOME_PROCESSIVE_SYNTHESIS_ON_THE_C_STRAND_OF_THE_TELOMERE	0.241318	2.90842e-07
REACTOME_MEIOSIS	0.240944	3.03764e-07
GRAHAM_CML_QUIESCENT_VS_CML_DIVIDING_DN	0.240714	3.11993e-07
REACTOME_TRANSPORT_OF_MATURE_MRNAS_DERIVED_FROM_INTRONLESS_TRANSCRIPTS	0.240121	3.34164e-07
PID_FOXO_PATHWAY	0.240059	3.36566e-07
BIOCARTA_ATRBRCA_PATHWAY	0.239794	3.47036e-07
REACTOME_TCF_DEPENDENT_SIGNALING_IN_RESPONSE_TO_WNT	0.239617	3.54211e-07
SIG_REGULATION_OF_THE_ACTIN_CYTOSKELETON_BY_RHO_GTPASES	0.239276	3.68425e-07
BIOCARTA_PTC1_PATHWAY	0.239123	3.74989e-07
REACTOME_SUMOYLATION_OF_CHROMATIN_ORGANIZATION_PROTEINS	0.239119	3.75178e-07
BIOCARTA_TNFR1_PATHWAY	0.238832	3.8777e-07
REACTOME_METABOLISM_OF_NON_CODING_RNA	0.238244	4.14872e-07
REACTOME_APOPTOTIC_EXECUTION_PHASE	0.237699	4.41644e-07
REACTOME_DUAL_INCISION_IN_GG_NER	0.23748	4.5288e-07
DIAZ_CHRONIC_MEYLOGENOUS_LEUKEMIA_UP	0.237469	4.53406e-07
REACTOME_INTERACTIONS_OF_VPR_WITH_HOST_CELLULAR_PROTEINS	0.237292	4.62701e-07
GAUSSMANN_MLL_AF4_FUSION_TARGETS_C_DN	0.237264	4.64164e-07
REACTOME_DEFECTIVE_TPR_MAY_CONFER_SUSCEPTIBILITY_TOWARDS_THYROID_PAPILLARY_CARCINOMA_TPC	0.237118	4.71974e-07
REACTOME_FANCONI_ANEMIA_PATHWAY	0.236948	4.81248e-07
GARGALOVIC_RESPONSE_TO_OXIDIZED_PHOSPHOLIPIDS_YELLOW_UP	0.236907	4.83488e-07
KRASNOSELSKAYA_ILF3_TARGETS_DN	0.236873	4.8536e-07
BURTON_ADIPOGENESIS_PEAK_AT_16HR	0.236843	4.87049e-07
FARMER_BREAST_CANCER_APOCRINE_VS_BASAL	0.236796	4.89637e-07
KEGG_HOMOLOGOUS_RECOMBINATION	0.236544	5.03922e-07
REACTOME_ANTIVIRAL_MECHANISM_BY_IFN_STIMULATED_GENES	0.236427	5.1069e-07
MATZUK_SPERMATOCYTE	0.23625	5.21103e-07
REACTOME_SIGNALING_BY_WNT	0.236215	5.23185e-07
GAZDA_DIAMOND_BLACKFAN_ANEMIA_PROGENITOR_DN	0.236168	5.25978e-07
REACTOME_SYNTHESIS_OF_ACTIVE_UBIQUITIN:_ROLES_OF_E1_AND_E2_ENZYMES	0.23616	5.26441e-07
INAMURA_LUNG_CANCER_SCC_UP	0.236037	5.33851e-07
ALCALAY_AML_BY_NPM1_LOCALIZATION_DN	0.236002	5.36004e-07
REACTOME_REPRODUCTION	0.235873	5.43909e-07
SWEET_KRAS_TARGETS_DN	0.235727	5.52974e-07
REACTOME_SLC_TRANSPORTER_DISORDERS	0.235268	5.82565e-07
KONG_E2F1_TARGETS	0.235247	5.83935e-07
NUNODA_RESPONSE_TO_DASATINIB_IMATINIB_UP	0.235235	5.84749e-07
BRUINS_UVC_RESPONSE_EARLY_LATE	0.234803	6.14012e-07
REACTOME_FORMATION_OF_SENESCENCE_ASSOCIATED_HETEROCHROMATIN_FOCI_SAHF	0.234214	6.56214e-07
GRAESSMANN_RESPONSE_TO_MC_AND_DOXORUBICIN_DN	0.233637	7.0032e-07
MATZUK_MEIOTIC_AND_DNA_REPAIR	0.233541	7.07896e-07
REACTOME_SMAC_XIAP_REGULATED_APOPTOTIC_RESPONSE	0.233427	7.17055e-07
BIOCARTA_ACTINY_PATHWAY	0.232477	7.97588e-07
LIAO_METASTASIS	0.232239	8.19145e-07
RAMASWAMY_METASTASIS_UP	0.231746	8.655e-07
SILIGAN_TARGETS_OF_EWS_FLI1_FUSION_DN	0.231646	8.75178e-07
SESTO_RESPONSE_TO_UV_C2	0.23127	9.12613e-07
REACTOME_ACTIVATED_NTRK2_SIGNALS_THROUGH_RAS	0.23104	9.3625e-07
OHASHI_AURKA_TARGETS	0.230776	9.64132e-07
YIH_RESPONSE_TO_ARSENITE_C1	0.230632	9.79687e-07
STONER_ESOPHAGEAL_CARCINOGENESIS_DN	0.230549	9.88724e-07
MYLLYKANGAS_AMPLIFICATION_HOT_SPOT_21	0.230527	9.91106e-07
CAFFAREL_RESPONSE_TO_THC_24HR_5_DN	0.230439	1.00083e-06
SHETH_LIVER_CANCER_VS_TXNIP_LOSS_PAM1	0.230218	1.02572e-06
BIOCARTA_IGF1MTOR_PATHWAY	0.230144	1.03411e-06
SENGUPTA_NASOPHARYNGEAL_CARCINOMA_WITH_LMP1_UP	0.229721	1.0837e-06
REACTOME_G1_PHASE	0.229669	1.08984e-06
KYNG_ENVIRONMENTAL_STRESS_RESPONSE_DN	0.229414	1.12097e-06
JAERVINEN_AMPLIFIED_IN_LARYNGEAL_CANCER	0.229206	1.14707e-06
KEGG_NUCLEOTIDE_EXCISION_REPAIR	0.229088	1.16208e-06
CHIANG_LIVER_CANCER_SUBCLASS_UNANNOTATED_DN	0.228969	1.17737e-06
SHIPP_DLBCL_VS_FOLLICULAR_LYMPHOMA_UP	0.228885	1.18827e-06
MALONEY_RESPONSE_TO_17AAG_DN	0.228658	1.21832e-06
REACTOME_PROGRAMMED_CELL_DEATH	0.227855	1.33061e-06
REACTOME_TRANSLESION_SYNTHESIS_BY_POLK	0.227353	1.40585e-06
SENESE_HDAC2_TARGETS_UP	0.227067	1.45049e-06
MMS_MOUSE_LYMPH_HIGH_4HRS_UP	0.22683	1.48844e-06
YUAN_ZNF143_PARTNERS	0.226638	1.51996e-06
GENTILE_UV_RESPONSE_CLUSTER_D6	0.22596	1.63621e-06
KEGG_NON_HOMOLOGOUS_END_JOINING	0.225956	1.63696e-06
PANGAS_TUMOR_SUPPRESSION_BY_SMAD1_AND_SMAD5_DN	0.225832	1.65913e-06
SMIRNOV_RESPONSE_TO_IR_2HR_DN	0.225444	1.73044e-06
SMITH_LIVER_CANCER	0.225393	1.74003e-06
ZHAN_MULTIPLE_MYELOMA_CD2_DN	0.22536	1.74624e-06
CREIGHTON_ENDOCRINE_THERAPY_RESISTANCE_1	0.225108	1.79463e-06
HAMAI_APOPTOSIS_VIA_TRAIL_UP	0.224973	1.82106e-06
VICENT_METASTASIS_UP	0.224911	1.83317e-06
THILLAINADESAN_ZNF217_TARGETS_UP	0.224885	1.83841e-06
VANTVEER_BREAST_CANCER_ESR1_DN	0.224833	1.84873e-06
KEGG_BASAL_TRANSCRIPTION_FACTORS	0.224748	1.86587e-06
MATZUK_IMPLANTATION_AND_UTERINE	0.224732	1.86909e-06
BIOCARTA_WNT_LRP6_PATHWAY	0.223996	2.02335e-06
HU_ANGIOGENESIS_DN	0.223965	2.03031e-06
IVANOV_MUTATED_IN_COLON_CANCER	0.22388	2.04896e-06
COLINA_TARGETS_OF_4EBP1_AND_4EBP2	0.223828	2.06029e-06
RHODES_CANCER_META_SIGNATURE	0.223791	2.06863e-06
REACTOME_DNA_DOUBLE_STRAND_BREAK_RESPONSE	0.223746	2.07867e-06
BIOCARTA_DNAFRAGMENT_PATHWAY	0.22303	2.2446e-06
REACTOME_CYTOCHROME_C_MEDIATED_APOPTOTIC_RESPONSE	0.222929	2.2692e-06
TOMLINS_METASTASIS_UP	0.222902	2.27568e-06
MARIADASON_RESPONSE_TO_BUTYRATE_SULINDAC_4	0.222249	2.44029e-06
REACTOME_SUMO_IS_PROTEOLYTICALLY_PROCESSED	0.222197	2.45379e-06
WAESCH_ANAPHASE_PROMOTING_COMPLEX	0.222024	2.49961e-06
MINGUEZ_LIVER_CANCER_VASCULAR_INVASION_UP	0.221745	2.57499e-06
TERAMOTO_OPN_TARGETS_CLUSTER_7	0.221197	2.72985e-06
REACTOME_NONHOMOLOGOUS_END_JOINING_NHEJ	0.220861	2.82892e-06
BIOCARTA_AKAPCENTROSOME_PATHWAY	0.220819	2.8416e-06
AMIT_EGF_RESPONSE_480_MCF10A	0.220223	3.02676e-06
DAZARD_UV_RESPONSE_CLUSTER_G6	0.220199	3.03435e-06
NAKAMURA_LUNG_CANCER	0.220187	3.03827e-06
SESTO_RESPONSE_TO_UV_C8	0.219853	3.14736e-06
LU_EZH2_TARGETS_DN	0.219543	3.25225e-06
OKUMURA_INFLAMMATORY_RESPONSE_LPS	0.219518	3.2607e-06
REACTOME_TP53_REGULATES_TRANSCRIPTION_OF_GENES_INVOLVED_IN_G2_CELL_CYCLE_ARREST	0.219068	3.41895e-06
MCCABE_HOXC6_TARGETS_CANCER_DN	0.219024	3.43493e-06
DANG_REGULATED_BY_MYC_UP	0.218966	3.45571e-06
HAHTOLA_MYCOSIS_FUNGOIDES_SKIN_DN	0.218899	3.48031e-06
DITTMER_PTHLH_TARGETS_DN	0.218682	3.56059e-06
YIH_RESPONSE_TO_ARSENITE_C3	0.218598	3.59204e-06
BROWNE_HCMV_INFECTION_16HR_UP	0.218588	3.59575e-06
GENTILE_UV_RESPONSE_CLUSTER_D4	0.217928	3.8535e-06
RAO_BOUND_BY_SALL4_ISOFORM_B	0.217914	3.85912e-06
PODAR_RESPONSE_TO_ADAPHOSTIN_DN	0.217584	3.99448e-06
REACTOME_TFAP2A_ACTS_AS_A_TRANSCRIPTIONAL_REPRESSOR_DURING_RETINOIC_ACID_INDUCED_CELL_DIFFERENTIATION	0.217583	3.99518e-06
REACTOME_SUMOYLATION_OF_UBIQUITINYLATION_PROTEINS	0.217534	4.01536e-06
TOOKER_GEMCITABINE_RESISTANCE_DN	0.217362	4.08847e-06
KARLSSON_TGFB1_TARGETS_UP	0.21713	4.18852e-06
ELVIDGE_HIF1A_TARGETS_UP	0.216907	4.28718e-06
RAMJAUN_APOPTOSIS_BY_TGFB1_VIA_MAPK1_DN	0.216579	4.4358e-06
KIM_PTEN_TARGETS_UP	0.216508	4.46891e-06
REACTOME_SUMOYLATION_OF_RNA_BINDING_PROTEINS	0.216413	4.51287e-06
PID_DELTA_NP63_PATHWAY	0.216257	4.58699e-06
REACTOME_INTEGRATION_OF_PROVIRUS	0.21625	4.58993e-06
REACTOME_TRNA_PROCESSING_IN_THE_NUCLEUS	0.216232	4.59881e-06
REACTOME_TRANSMISSION_ACROSS_ELECTRICAL_SYNAPSES	0.21596	4.73032e-06
REACTOME_N_GLYCAN_ANTENNAE_ELONGATION	0.215931	4.74485e-06
SCHLOSSER_MYC_TARGETS_REPRESSED_BY_SERUM	0.215827	4.79585e-06
BIOCARTA_NPC_PATHWAY	0.21575	4.83471e-06
GAUSSMANN_MLL_AF4_FUSION_TARGETS_F_DN	0.215723	4.84789e-06
REACTOME_APC_C:CDH1_MEDIATED_DEGRADATION_OF_CDC20_AND_OTHER_APC_C:CDH1_TARGETED_PROTEINS_IN_LATE_MITOSIS_EARLY_G1	0.215669	4.87525e-06
REACTOME_COHESIN_LOADING_ONTO_CHROMATIN	0.215542	4.93964e-06
SMITH_TERT_TARGETS_UP	0.215059	5.19281e-06
SMIRNOV_RESPONSE_TO_IR_6HR_DN	0.214827	5.31838e-06
GRYDER_PAX3FOXO1_ENHANCERS_KO_DOWN	0.214529	5.48425e-06
REACTOME_CELLULAR_SENESCENCE	0.214467	5.51956e-06
REACTOME_TRANSCRIPTIONAL_REGULATION_BY_RUNX2	0.214422	5.54499e-06
SLEBOS_HEAD_AND_NECK_CANCER_WITH_HPV_UP	0.214202	5.6719e-06
REACTOME_SIGNALING_BY_NOTCH	0.214201	5.67284e-06
REACTOME_CRISTAE_FORMATION	0.214133	5.71258e-06
PID_P53_REGULATION_PATHWAY	0.214102	5.73055e-06
FREDERICK_PRKCI_TARGETS	0.214086	5.74016e-06
BONCI_TARGETS_OF_MIR15A_AND_MIR16_1	0.213889	5.85759e-06
CHIBA_RESPONSE_TO_TSA_DN	0.21375	5.94191e-06
SMID_BREAST_CANCER_RELAPSE_IN_BONE_DN	0.213635	6.01238e-06
HERNANDEZ_MITOTIC_ARREST_BY_DOCETAXEL_1_DN	0.213435	6.13693e-06
MILI_PSEUDOPODIA_HAPTOTAXIS_UP	0.213342	6.19559e-06
REACTOME_RECRUITMENT_OF_NUMA_TO_MITOTIC_CENTROSOMES	0.213321	6.20871e-06
REACTOME_CONVERSION_FROM_APC_C:CDC20_TO_APC_C:CDH1_IN_LATE_ANAPHASE	0.213263	6.24609e-06
DOANE_BREAST_CANCER_ESR1_DN	0.212916	6.47126e-06
GENTILE_UV_RESPONSE_CLUSTER_D1	0.212845	6.51898e-06
REACTOME_MEIOTIC_RECOMBINATION	0.212844	6.51956e-06
TIEN_INTESTINE_PROBIOTICS_2HR_DN	0.21266	6.64319e-06
REACTOME_SENESCENCE_ASSOCIATED_SECRETORY_PHENOTYPE_SASP	0.212589	6.69155e-06
REACTOME_CDK_MEDIATED_PHOSPHORYLATION_AND_REMOVAL_OF_CDC6	0.212469	6.77397e-06
MOREAUX_MULTIPLE_MYELOMA_BY_TACI_DN	0.212404	6.81895e-06
GROSS_HYPOXIA_VIA_ELK3_AND_HIF1A_DN	0.212207	6.95727e-06
REACTOME_E3_UBIQUITIN_LIGASES_UBIQUITINATE_TARGET_PROTEINS	0.21156	7.43055e-06
VANHARANTA_UTERINE_FIBROID_WITH_7Q_DELETION_UP	0.211394	7.55658e-06
KAN_RESPONSE_TO_ARSENIC_TRIOXIDE	0.211367	7.57716e-06
TURASHVILI_BREAST_DUCTAL_CARCINOMA_VS_DUCTAL_NORMAL_UP	0.21126	7.66039e-06
PILON_KLF1_TARGETS_DN	0.211195	7.71068e-06
REACTOME_DNA_DAMAGE_TELOMERE_STRESS_INDUCED_SENESCENCE	0.210962	7.89495e-06
KEGG_P53_SIGNALING_PATHWAY	0.210719	8.09149e-06
WAKASUGI_HAVE_ZNF143_BINDING_SITES	0.210469	8.29898e-06
DACOSTA_UV_RESPONSE_VIA_ERCC3_COMMON_DN	0.21045	8.31484e-06
REACTOME_VIRAL_MESSENGER_RNA_SYNTHESIS	0.210425	8.3359e-06
MULLIGHAN_NPM1_MUTATED_SIGNATURE_1_UP	0.210269	8.46773e-06
REACTOME_BASE_EXCISION_REPAIR	0.210178	8.54583e-06
KYNG_RESPONSE_TO_H2O2_VIA_ERCC6_UP	0.209578	9.07842e-06
REACTOME_CARGO_TRAFFICKING_TO_THE_PERICILIARY_MEMBRANE	0.208612	1.00029e-05
REACTOME_APOPTOTIC_CLEAVAGE_OF_CELLULAR_PROTEINS	0.208459	1.01576e-05
BUYTAERT_PHOTODYNAMIC_THERAPY_STRESS_DN	0.208358	1.02605e-05
FINETTI_BREAST_CANCERS_KINOME_GRAY	0.208244	1.0378e-05
REACTOME_GENE_SILENCING_BY_RNA	0.208036	1.05964e-05
REACTOME_DEPOLYMERISATION_OF_THE_NUCLEAR_LAMINA	0.207947	1.06903e-05
KANG_DOXORUBICIN_RESISTANCE_DN	0.207861	1.07825e-05
XU_HGF_TARGETS_INDUCED_BY_AKT1_48HR_DN	0.207744	1.09093e-05
CAIRO_HEPATOBLASTOMA_POOR_SURVIVAL	0.207368	1.13256e-05
GALI_TP53_TARGETS_APOPTOTIC_DN	0.207273	1.14334e-05
BAFNA_MUC4_TARGETS_UP	0.207119	1.16094e-05
SEIDEN_ONCOGENESIS_BY_MET	0.206234	1.26756e-05
CAIRO_HEPATOBLASTOMA_UP	0.205923	1.30716e-05
RICKMAN_HEAD_AND_NECK_CANCER_C	0.20586	1.31521e-05
REACTOME_METALLOPROTEASE_DUBS	0.205352	1.38288e-05
REACTOME_IRAK2_MEDIATED_ACTIVATION_OF_TAK1_COMPLEX	0.205192	1.40489e-05
GOTZMANN_EPITHELIAL_TO_MESENCHYMAL_TRANSITION_UP	0.204643	1.48276e-05
BRUINS_UVC_RESPONSE_LATE	0.204634	1.48417e-05
REACTOME_ANCHORING_OF_THE_BASAL_BODY_TO_THE_PLASMA_MEMBRANE	0.204205	1.54784e-05
REACTOME_EPIGENETIC_REGULATION_OF_GENE_EXPRESSION	0.204195	1.54948e-05
BOYLAN_MULTIPLE_MYELOMA_C_D_UP	0.204172	1.55288e-05
XU_AKT1_TARGETS_48HR	0.203744	1.61938e-05
LI_WILMS_TUMOR_VS_FETAL_KIDNEY_2_UP	0.203556	1.64935e-05
DAIRKEE_CANCER_PRONE_RESPONSE_BPA	0.203095	1.72526e-05
REACTOME_OPSINS	0.20299	1.743e-05
REACTOME_HIV_LIFE_CYCLE	0.202983	1.74421e-05
JIANG_TIP30_TARGETS_UP	0.202175	1.88681e-05
POMEROY_MEDULLOBLASTOMA_PROGNOSIS_DN	0.202056	1.90875e-05
BILD_E2F3_ONCOGENIC_SIGNATURE	0.201603	1.99433e-05
REACTOME_GLUCOSE_METABOLISM	0.200995	2.11496e-05
XU_GH1_EXOGENOUS_TARGETS_DN	0.200634	2.19002e-05
REACTOME_THE_ROLE_OF_GTSE1_IN_G2_M_PROGRESSION_AFTER_G2_CHECKPOINT	0.200633	2.19015e-05
GROSS_HIF1A_TARGETS_DN	0.200611	2.1948e-05
LI_CISPLATIN_RESISTANCE_UP	0.200515	2.21513e-05
FIRESTEIN_CTNNB1_PATHWAY_AND_PROLIFERATION	0.20049	2.22053e-05
REACTOME_TRANSCRIPTIONAL_REGULATION_BY_SMALL_RNAS	0.200157	2.29264e-05
REACTOME_G1_S_DNA_DAMAGE_CHECKPOINTS	0.200055	2.31538e-05
HOFMANN_CELL_LYMPHOMA_UP	0.19979	2.37494e-05
LI_CYTIDINE_ANALOG_PATHWAY	0.199788	2.37543e-05
REACTOME_SCF_SKP2_MEDIATED_DEGRADATION_OF_P27_P21	0.19963	2.4116e-05
HUANG_GATA2_TARGETS_DN	0.198704	2.63483e-05
LIU_COMMON_CANCER_GENES	0.19824	2.75403e-05
REACTOME_CYCLIN_A:CDK2_ASSOCIATED_EVENTS_AT_S_PHASE_ENTRY	0.197996	2.81854e-05
KIM_TIAL1_TARGETS	0.197539	2.94355e-05
REACTOME_CENTROSOME_MATURATION	0.197502	2.95386e-05
KONDO_COLON_CANCER_HCP_WITH_H3K27ME1	0.197493	2.95659e-05
WEI_MIR34A_TARGETS	0.197051	3.08289e-05
PID_LIS1_PATHWAY	0.197036	3.08715e-05
KANNAN_TP53_TARGETS_DN	0.196933	3.11748e-05
REACTOME_GENE_EXPRESSION_TRANSCRIPTION	0.19681	3.15399e-05
REACTOME_PEPTIDE_HORMONE_BIOSYNTHESIS	0.196641	3.20462e-05
FIGUEROA_AML_METHYLATION_CLUSTER_2_UP	0.196592	3.21944e-05
MARTIN_VIRAL_GPCR_SIGNALING_DN	0.196476	3.25509e-05
BIOCARTA_AKAP13_PATHWAY	0.196392	3.28103e-05
WANG_CLIM2_TARGETS_DN	0.196335	3.29858e-05
BENPORATH_NOS_TARGETS	0.196182	3.3465e-05
YAO_TEMPORAL_RESPONSE_TO_PROGESTERONE_CLUSTER_15	0.195827	3.46022e-05
FERRANDO_T_ALL_WITH_MLL_ENL_FUSION_DN	0.195793	3.47127e-05
LIU_VMYB_TARGETS_UP	0.195686	3.50633e-05
BIOCARTA_CTBP1_PATHWAY	0.195642	3.52082e-05
DAZARD_RESPONSE_TO_UV_SCC_UP	0.195635	3.52317e-05
REACTOME_GLOBAL_GENOME_NUCLEOTIDE_EXCISION_REPAIR_GG_NER	0.195465	3.57996e-05
MATTIOLI_MULTIPLE_MYELOMA_SUBGROUPS	0.195399	3.60193e-05
KRIEG_HYPOXIA_NOT_VIA_KDM3A	0.195318	3.62968e-05
OUELLET_OVARIAN_CANCER_INVASIVE_VS_LMP_UP	0.194746	3.8292e-05
REACTOME_SYNTHESIS_OF_PYROPHOSPHATES_IN_THE_CYTOSOL	0.194698	3.84657e-05
DACOSTA_UV_RESPONSE_VIA_ERCC3_DN	0.194369	3.96657e-05
JOHNSTONE_PARVB_TARGETS_2_DN	0.194272	4.00256e-05
REACTOME_MEIOTIC_SYNAPSIS	0.194102	4.06659e-05
GHO_ATF5_TARGETS_DN	0.194	4.10541e-05
DEBIASI_APOPTOSIS_BY_REOVIRUS_INFECTION_UP	0.193844	4.16532e-05
REACTOME_LIPOPHAGY	0.193774	4.19252e-05
REACTOME_SUMO_IS_CONJUGATED_TO_E1_UBA2:SAE1	0.193695	4.22369e-05
CAFFAREL_RESPONSE_TO_THC_24HR_3_DN	0.193612	4.2562e-05
LIEN_BREAST_CARCINOMA_METAPLASTIC_VS_DUCTAL_UP	0.193576	4.27057e-05
MIKKELSEN_PLURIPOTENT_STATE_UP	0.193382	4.34834e-05
REACTOME_RESOLUTION_OF_ABASIC_SITES_AP_SITES	0.193193	4.42541e-05
SESTO_RESPONSE_TO_UV_C5	0.192837	4.57376e-05
REACTOME_TRYPTOPHAN_CATABOLISM	0.192814	4.58359e-05
KOKKINAKIS_METHIONINE_DEPRIVATION_96HR_DN	0.192223	4.841e-05
RODRIGUES_DCC_TARGETS_UP	0.192189	4.85617e-05
ZHAN_VARIABLE_EARLY_DIFFERENTIATION_GENES_DN	0.192047	4.9202e-05
GOTTWEIN_TARGETS_OF_KSHV_MIR_K12_11	0.191895	4.98965e-05
REACTOME_SIGNALING_BY_NUCLEAR_RECEPTORS	0.191707	5.07674e-05
TURASHVILI_BREAST_CARCINOMA_DUCTAL_VS_LOBULAR_UP	0.191195	5.3216e-05
SCHLOSSER_MYC_TARGETS_AND_SERUM_RESPONSE_DN	0.191108	5.36416e-05
REACTOME_COPI_INDEPENDENT_GOLGI_TO_ER_RETROGRADE_TRAFFIC	0.191038	5.3988e-05
REACTOME_ACTIVATED_NTRK2_SIGNALS_THROUGH_FRS2_AND_FRS3	0.190991	5.42221e-05
REACTOME_ACTIVATION_OF_HOX_GENES_DURING_DIFFERENTIATION	0.190811	5.51228e-05
ELVIDGE_HYPOXIA_DN	0.190713	5.56229e-05
MULLIGAN_NTF3_SIGNALING_VIA_INSR_AND_IGF1R_UP	0.190397	5.7255e-05
REACTOME_GENE_AND_PROTEIN_EXPRESSION_BY_JAK_STAT_SIGNALING_AFTER_INTERLEUKIN_12_STIMULATION	0.190273	5.79076e-05
REACTOME_TP53_REGULATES_TRANSCRIPTION_OF_DNA_REPAIR_GENES	0.190196	5.83127e-05
DAZARD_RESPONSE_TO_UV_NHEK_DN	0.190067	5.90077e-05
COLDREN_GEFITINIB_RESISTANCE_UP	0.18991	5.98558e-05
BIOCARTA_BCELLSURVIVAL_PATHWAY	0.189856	6.01549e-05
REACTOME_HEDGEHOG_ON_STATE	0.189594	6.16074e-05
REACTOME_ORGANELLE_BIOGENESIS_AND_MAINTENANCE	0.189179	6.39804e-05
GHANDHI_BYSTANDER_IRRADIATION_UP	0.188757	6.64788e-05
REACTOME_PROCESSING_OF_CAPPED_INTRONLESS_PRE_MRNA	0.187776	7.26448e-05
KIM_MYC_AMPLIFICATION_TARGETS_UP	0.187756	7.2778e-05
WOOD_EBV_EBNA1_TARGETS_DN	0.187642	7.3531e-05
REACTOME_POLB_DEPENDENT_LONG_PATCH_BASE_EXCISION_REPAIR	0.187631	7.36029e-05
NEWMAN_ERCC6_TARGETS_UP	0.18707	7.74178e-05
MODY_HIPPOCAMPUS_PRENATAL	0.186824	7.91437e-05
KEGG_ONE_CARBON_POOL_BY_FOLATE	0.186526	8.12933e-05
SHAFFER_IRF4_TARGETS_IN_ACTIVATED_B_LYMPHOCYTE	0.186282	8.30904e-05
REACTOME_HOST_INTERACTIONS_OF_HIV_FACTORS	0.186271	8.31671e-05
MARIADASON_REGULATED_BY_HISTONE_ACETYLATION_DN	0.18608	8.46023e-05
GU_PDEF_TARGETS_DN	0.185631	8.80616e-05
GALE_APL_WITH_FLT3_MUTATED_UP	0.185592	8.83747e-05
PYEON_HPV_POSITIVE_TUMORS_UP	0.185487	8.92038e-05
REACTOME_UCH_PROTEINASES	0.185419	8.97491e-05
LAU_APOPTOSIS_CDKN2A_UP	0.185089	9.24236e-05
BARIS_THYROID_CANCER_UP	0.184844	9.44554e-05
LEONARD_HYPOXIA	0.184627	9.63006e-05
REACTOME_TRANSPORT_OF_MATURE_TRANSCRIPT_TO_CYTOPLASM	0.184008	0.000101727
LIU_IL13_MEMORY_MODEL_DN	0.183854	0.000103118
PEART_HDAC_PROLIFERATION_CLUSTER_DN	0.18382	0.000103428
TAYLOR_METHYLATED_IN_ACUTE_LYMPHOBLASTIC_LEUKEMIA	0.183814	0.000103488
RAY_TARGETS_OF_P210_BCR_ABL_FUSION_UP	0.183738	0.000104189
REACTOME_DSCAM_INTERACTIONS	0.183391	0.000107426
WEBER_METHYLATED_ICP_IN_SPERM_UP	0.183327	0.000108037
KEGG_SMALL_CELL_LUNG_CANCER	0.183268	0.000108592
REACTOME_TRANSLOCATION_OF_SLC2A4_GLUT4_TO_THE_PLASMA_MEMBRANE	0.183251	0.000108755
TORCHIA_TARGETS_OF_EWSR1_FLI1_FUSION_TOP20_DN	0.183213	0.000109123
WANG_ADIPOGENIC_GENES_REPRESSED_BY_SIRT1	0.183191	0.000109333
REACTOME_NEDDYLATION	0.183153	0.000109703
WEIGEL_OXIDATIVE_STRESS_BY_HNE_AND_H2O2	0.18273	0.00011386
WILLERT_WNT_SIGNALING	0.18258	0.000115374
DING_LUNG_CANCER_EXPRESSION_BY_COPY_NUMBER	0.182568	0.000115497
REACTOME_GLYCOGEN_BREAKDOWN_GLYCOGENOLYSIS	0.1825	0.000116182
NIKOLSKY_BREAST_CANCER_14Q22_AMPLICON	0.182378	0.000117441
FRASOR_RESPONSE_TO_ESTRADIOL_UP	0.1822	0.000119284
REACTOME_CLASS_I_MHC_MEDIATED_ANTIGEN_PROCESSING_PRESENTATION	0.182012	0.000121262
BIOCARTA_ATM_PATHWAY	0.181771	0.000123852
CHIANG_LIVER_CANCER_SUBCLASS_POLYSOMY7_DN	0.181707	0.000124549
SA_G1_AND_S_PHASES	0.181368	0.000128284
REACTOME_RUNX1_REGULATES_TRANSCRIPTION_OF_GENES_INVOLVED_IN_DIFFERENTIATION_OF_HSCS	0.181179	0.000130418
XU_RESPONSE_TO_TRETINOIN_DN	0.181169	0.000130536
ANDERSEN_CHOLANGIOCARCINOMA_CLASS2	0.180937	0.000133195
PRAMOONJAGO_SOX4_TARGETS_DN	0.180887	0.000133774
CAFFAREL_RESPONSE_TO_THC_8HR_3_UP	0.180878	0.000133884
KRIEG_HYPOXIA_VIA_KDM3A	0.180834	0.000134397
HOLLEMAN_ASPARAGINASE_RESISTANCE_ALL_DN	0.180818	0.000134578
LASTOWSKA_COAMPLIFIED_WITH_MYCN	0.180597	0.000137198
REACTOME_SHC_RELATED_EVENTS_TRIGGERED_BY_IGF1R	0.180271	0.000141128
REACTOME_SIGNAL_ATTENUATION	0.180196	0.000142048
REN_MIF_TARGETS_DN	0.180191	0.000142113
BERNARD_PPAPDC1B_TARGETS_UP	0.180074	0.000143569
GAL_LEUKEMIC_STEM_CELL_DN	0.180012	0.000144335
REACTOME_ESR_MEDIATED_SIGNALING	0.179835	0.00014657
REACTOME_INTERLEUKIN_12_SIGNALING	0.179668	0.000148699
MYLLYKANGAS_AMPLIFICATION_HOT_SPOT_17	0.179614	0.000149391
KEGG_PYRIMIDINE_METABOLISM	0.17956	0.0001501
LOPEZ_MESOTHELIOMA_SURVIVAL_OVERALL_DN	0.179375	0.000152516
REACTOME_HIV_INFECTION	0.179194	0.00015491
JAZAG_TGFB1_SIGNALING_UP	0.179002	0.000157505
CHANDRAN_METASTASIS_UP	0.178922	0.000158584
CAFFAREL_RESPONSE_TO_THC_8HR_3_DN	0.178858	0.000159463
CASTELLANO_HRAS_TARGETS_DN	0.178817	0.000160024
REACTOME_PRC2_METHYLATES_HISTONES_AND_DNA	0.178791	0.000160389
PID_P75_NTR_PATHWAY	0.178425	0.000165512
REACTOME_SLBP_DEPENDENT_PROCESSING_OF_REPLICATION_DEPENDENT_HISTONE_PRE_MRNAS	0.178366	0.000166359
REACTOME_RMTS_METHYLATE_HISTONE_ARGININES	0.178228	0.000168343
REACTOME_HEDGEHOG_OFF_STATE	0.178159	0.000169334
PARK_HSC_VS_MULTIPOTENT_PROGENITORS_DN	0.178092	0.000170312
LANDIS_ERBB2_BREAST_TUMORS_65_UP	0.177908	0.000173024
BIOCARTA_SUMO_PATHWAY	0.177837	0.000174081
SESTO_RESPONSE_TO_UV_C1	0.177806	0.00017453
DANG_MYC_TARGETS_UP	0.177714	0.00017592
REACTOME_SUMO_IS_TRANSFERRED_FROM_E1_TO_E2_UBE2I_UBC9	0.177674	0.000176524
HOEGERKORP_CD44_TARGETS_TEMPORAL_DN	0.177557	0.000178292
REACTOME_REGULATION_OF_RAS_BY_GAPS	0.177458	0.000179809
REACTOME_SYNTHESIS_OF_UDP_N_ACETYL_GLUCOSAMINE	0.177268	0.000182749
BIOCARTA_MITOCHONDRIA_PATHWAY	0.177251	0.000183019
REACTOME_CILIUM_ASSEMBLY	0.177209	0.000183668
LINSLEY_MIR16_TARGETS	0.177201	0.000183798
BOYAULT_LIVER_CANCER_SUBCLASS_G2	0.177091	0.000185534
LIN_NPAS4_TARGETS_UP	0.176937	0.000187977
PID_MYC_ACTIV_PATHWAY	0.176891	0.000188729
IKEDA_MIR133_TARGETS_UP	0.17674	0.00019117
REACTOME_ASYMMETRIC_LOCALIZATION_OF_PCP_PROTEINS	0.176664	0.000192413
CHESLER_BRAIN_D6MIT150_QTL_TRANS	0.176628	0.000192989
SHETH_LIVER_CANCER_VS_TXNIP_LOSS_PAM6	0.176433	0.000196216
AMIT_EGF_RESPONSE_240_MCF10A	0.176427	0.000196317
CARD_MIR302A_TARGETS	0.176417	0.000196484
GENTILE_UV_RESPONSE_CLUSTER_D8	0.176128	0.000201376
REACTOME_TRANSCRIPTIONAL_REGULATION_BY_THE_AP_2_TFAP2_FAMILY_OF_TRANSCRIPTION_FACTORS	0.176112	0.000201652
REACTOME_ACTIVATION_OF_RAC1	0.176008	0.00020343
REACTOME_APOPTOTIC_FACTOR_MEDIATED_RESPONSE	0.175688	0.000209022
YIH_RESPONSE_TO_ARSENITE_C4	0.175312	0.000215773
REACTOME_DUAL_INCISION_IN_TC_NER	0.175033	0.000220918
SHETH_LIVER_CANCER_VS_TXNIP_LOSS_PAM3	0.174877	0.000223834
DE_YY1_TARGETS_DN	0.174869	0.000223996
REACTOME_SENSING_OF_DNA_DOUBLE_STRAND_BREAKS	0.174799	0.000225317
CHNG_MULTIPLE_MYELOMA_HYPERPLOID_DN	0.174666	0.000227854
REACTOME_VXPX_CARGO_TARGETING_TO_CILIUM	0.174658	0.000228008
MAYBURD_RESPONSE_TO_L663536_UP	0.174609	0.000228942
ACEVEDO_LIVER_TUMOR_VS_NORMAL_ADJACENT_TISSUE_UP	0.174408	0.000232855
CONCANNON_APOPTOSIS_BY_EPOXOMICIN_DN	0.17421	0.000236758
RAMJAUN_APOPTOSIS_BY_TGFB1_VIA_SMAD4_DN	0.173806	0.000244912
HOSHIDA_LIVER_CANCER_SUBCLASS_S2	0.173798	0.000245073
REACTOME_SIGNALING_BY_WNT_IN_CANCER	0.173583	0.000249526
TERAO_AOX4_TARGETS_SKIN_UP	0.173558	0.000250051
BIOCARTA_EEA1_PATHWAY	0.173466	0.000251985
MCGARVEY_SILENCED_BY_METHYLATION_IN_COLON_CANCER	0.173363	0.000254164
SENESE_HDAC1_TARGETS_UP	0.173261	0.000256336
REACTOME_GLYCOGEN_SYNTHESIS	0.173126	0.000259238
REACTOME_MET_ACTIVATES_RAS_SIGNALING	0.173082	0.000260211
BORLAK_LIVER_CANCER_EGF_UP	0.173069	0.000260484
BENPORATH_MYC_MAX_TARGETS	0.172649	0.000269766
WHITFIELD_CELL_CYCLE_G1_S	0.172432	0.000274677
REACTOME_REGULATION_OF_RUNX2_EXPRESSION_AND_ACTIVITY	0.172229	0.000279359
CROMER_TUMORIGENESIS_UP	0.171942	0.000286078
REACTOME_SERINE_BIOSYNTHESIS	0.171925	0.000286493
REACTOME_TRANSCRIPTIONAL_REGULATION_OF_PLURIPOTENT_STEM_CELLS	0.171915	0.000286737
REACTOME_REGULATION_OF_APOPTOSIS	0.171865	0.000287905
NUYTTEN_NIPP1_TARGETS_UP	0.17186	0.000288028
HASLINGER_B_CLL_WITH_CHROMOSOME_12_TRISOMY	0.171843	0.000288443
INAMURA_LUNG_CANCER_SCC_SUBTYPES_UP	0.171798	0.000289508
MARTINEZ_RB1_TARGETS_UP	0.17172	0.000291394
YAGI_AML_SURVIVAL	0.171632	0.000293518
MATTIOLI_MGUS_VS_PCL	0.171357	0.000300293
RAHMAN_TP53_TARGETS_PHOSPHORYLATED	0.171264	0.000302598
KEGG_BIOSYNTHESIS_OF_UNSATURATED_FATTY_ACIDS	0.171152	0.000305405
STREICHER_LSM1_TARGETS_DN	0.17104	0.000308251
REACTOME_NEGATIVE_EPIGENETIC_REGULATION_OF_RRNA_EXPRESSION	0.170999	0.000309286
PID_CDC42_REG_PATHWAY	0.170923	0.000311237
COULOUARN_TEMPORAL_TGFB1_SIGNATURE_UP	0.170632	0.000318795
SCHUHMACHER_MYC_TARGETS_UP	0.170571	0.00032039
BIOCARTA_RAN_PATHWAY	0.17057	0.000320415
REACTOME_VITAMIN_B5_PANTOTHENATE_METABOLISM	0.170554	0.000320852
REACTOME_METABOLISM_OF_CARBOHYDRATES	0.170376	0.000325566
KATSANOU_ELAVL1_TARGETS_DN	0.170373	0.000325642
REACTOME_BBSOME_MEDIATED_CARGO_TARGETING_TO_CILIUM	0.170252	0.0003289
WANG_NEOPLASTIC_TRANSFORMATION_BY_CCND1_MYC	0.17017	0.00033112
MONNIER_POSTRADIATION_TUMOR_ESCAPE_UP	0.169974	0.000336515
BARRIER_COLON_CANCER_RECURRENCE_UP	0.169906	0.000338384
REACTOME_TRANSCRIPTION_COUPLED_NUCLEOTIDE_EXCISION_REPAIR_TC_NER	0.169895	0.000338689
MARTORIATI_MDM4_TARGETS_NEUROEPITHELIUM_UP	0.169849	0.000339978
REACTOME_ATTACHMENT_OF_GPI_ANCHOR_TO_UPAR	0.1697	0.000344158
FORTSCHEGGER_PHF8_TARGETS_UP	0.169448	0.000351327
REACTOME_REGULATION_OF_PTEN_STABILITY_AND_ACTIVITY	0.169302	0.000355546
REACTOME_GENERIC_TRANSCRIPTION_PATHWAY	0.1693	0.000355591
PUJANA_ATM_PCC_NETWORK	0.169282	0.000356107
REACTOME_MITOCHONDRIAL_TRNA_AMINOACYLATION	0.169136	0.000360376
ZHOU_PANCREATIC_BETA_CELL	0.169114	0.00036103
REACTOME_PI3K_AKT_ACTIVATION	0.169035	0.000363378
REACTOME_CELLULAR_RESPONSE_TO_HYPOXIA	0.168999	0.000364438
DANG_BOUND_BY_MYC	0.168963	0.000365521
JIANG_HYPOXIA_CANCER	0.168914	0.000366974
REACTOME_FBXL7_DOWN_REGULATES_AURKA_DURING_MITOTIC_ENTRY_AND_IN_EARLY_MITOSIS	0.168844	0.000369076
OUILLETTE_CLL_13Q14_DELETION_UP	0.168813	0.000370019
MYLLYKANGAS_AMPLIFICATION_HOT_SPOT_24	0.167862	0.000399756
SCHAEFFER_PROSTATE_DEVELOPMENT_AND_CANCER_BOX3	0.167849	0.000400176
REACTOME_PROCESSING_OF_INTRONLESS_PRE_MRNAS	0.167811	0.000401401
BAE_BRCA1_TARGETS_UP	0.16769	0.000405345
BROWNE_HCMV_INFECTION_14HR_UP	0.167503	0.000411534
PEPPER_CHRONIC_LYMPHOCYTIC_LEUKEMIA_DN	0.167466	0.000412761
REACTOME_SHC1_EVENTS_IN_ERBB4_SIGNALING	0.167281	0.000418981
PROVENZANI_METASTASIS_UP	0.167152	0.000423401
KEGG_PURINE_METABOLISM	0.166969	0.000429675
ACEVEDO_LIVER_CANCER_UP	0.166702	0.000439034
YANG_BREAST_CANCER_ESR1_DN	0.166624	0.000441809
RAO_BOUND_BY_SALL4_ISOFORM_A	0.166597	0.000442764
GROSS_HYPOXIA_VIA_ELK3_ONLY_UP	0.166194	0.000457362
GAZIN_EPIGENETIC_SILENCING_BY_KRAS	0.16617	0.000458223
WELCSH_BRCA1_TARGETS_UP	0.166017	0.000463901
REACTOME_SIGNALING_BY_HEDGEHOG	0.165953	0.000466285
REACTOME_DOWNSTREAM_SIGNALING_EVENTS_OF_B_CELL_RECEPTOR_BCR	0.165918	0.000467595
BROWNE_HCMV_INFECTION_30MIN_DN	0.165644	0.000477969
RICKMAN_TUMOR_DIFFERENTIATED_WELL_VS_MODERATELY_DN	0.165643	0.000478002
NIKOLSKY_BREAST_CANCER_7P15_AMPLICON	0.165527	0.00048248
BIOCARTA_P53_PATHWAY	0.165462	0.000484988
WATANABE_RECTAL_CANCER_RADIOTHERAPY_RESPONSIVE_DN	0.165324	0.000490362
BOYLAN_MULTIPLE_MYELOMA_C_CLUSTER_UP	0.165178	0.000496126
SENESE_HDAC3_TARGETS_DN	0.165067	0.000500518
KONDO_COLON_CANCER_HCP_WITH_H3K27ME3	0.16504	0.000501602
SCHLOSSER_SERUM_RESPONSE_DN	0.16497	0.000504418
ZERBINI_RESPONSE_TO_SULINDAC_UP	0.164926	0.000506193
KIM_ALL_DISORDERS_OLIGODENDROCYTE_NUMBER_CORR_DN	0.164877	0.000508169
FIGUEROA_AML_METHYLATION_CLUSTER_5_UP	0.164876	0.000508201
REACTOME_TRANSCRIPTIONAL_REGULATION_BY_RUNX1	0.164674	0.000516445
ENK_UV_RESPONSE_EPIDERMIS_UP	0.164672	0.00051656
REACTOME_REGULATED_PROTEOLYSIS_OF_P75NTR	0.164569	0.000520814
CHEOK_RESPONSE_TO_MERCAPTOPURINE_AND_LD_MTX_UP	0.164375	0.000528875
REACTOME_COOPERATION_OF_PDCL_PHLP1_AND_TRIC_CCT_IN_G_PROTEIN_BETA_FOLDING	0.164342	0.000530276
REACTOME_KERATINIZATION	0.164133	0.000539145
STAMBOLSKY_RESPONSE_TO_VITAMIN_D3_UP	0.164046	0.000542877
CUI_TCF21_TARGETS_2_UP	0.163871	0.000550468
XU_RESPONSE_TO_TRETINOIN_AND_NSC682994_DN	0.163797	0.000553725
PID_PI3KCI_AKT_PATHWAY	0.163779	0.000554527
REACTOME_ERYTHROPOIETIN_ACTIVATES_RAS	0.163473	0.000568128
REACTOME_FOLDING_OF_ACTIN_BY_CCT_TRIC	0.163433	0.00056991
REACTOME_PTK6_REGULATES_CELL_CYCLE	0.163268	0.000577382
REACTOME_ACTIVATION_OF_NF_KAPPAB_IN_B_CELLS	0.16318	0.000581428
YEGNASUBRAMANIAN_PROSTATE_CANCER	0.163174	0.000581689
REACTOME_MRNA_DECAY_BY_5_TO_3_EXORIBONUCLEASE	0.163082	0.000585944
SENESE_HDAC3_TARGETS_UP	0.162957	0.000591741
REACTOME_DNA_METHYLATION	0.162927	0.000593116
KUROKAWA_LIVER_CANCER_EARLY_RECURRENCE_DN	0.162827	0.00059782
RIGGI_EWING_SARCOMA_PROGENITOR_DN	0.162684	0.00060461
VERNELL_RETINOBLASTOMA_PATHWAY_DN	0.162458	0.000615439
REACTOME_2_LTR_CIRCLE_FORMATION	0.162323	0.000622028
REACTOME_DEGRADATION_OF_GLI1_BY_THE_PROTEASOME	0.161807	0.000647711
BILD_SRC_ONCOGENIC_SIGNATURE	0.161732	0.000651538
RICKMAN_TUMOR_DIFFERENTIATED_MODERATELY_VS_POORLY_DN	0.16136	0.000670756
REACTOME_REGULATION_OF_GLYCOLYSIS_BY_FRUCTOSE_2_6_BISPHOSPHATE_METABOLISM	0.161344	0.000671602
LEE_METASTASIS_AND_RNA_PROCESSING_UP	0.161117	0.000683603
REACTOME_NEURODEGENERATIVE_DISEASES	0.160858	0.000697543
PID_CIRCADIAN_PATHWAY	0.160713	0.000705474
REACTOME_RNA_POLYMERASE_II_TRANSCRIBES_SNRNA_GENES	0.160676	0.000707519
JI_METASTASIS_REPRESSED_BY_STK11	0.160438	0.000720745
REACTOME_PCP_CE_PATHWAY	0.160388	0.000723563
LIANG_HEMATOPOIESIS_STEM_CELL_NUMBER_SMALL_VS_HUGE_UP	0.160016	0.000744722
REACTOME_NUCLEOTIDE_EXCISION_REPAIR	0.159645	0.000766483
WEBER_METHYLATED_HCP_IN_SPERM_DN	0.159268	0.000789091
REACTOME_ATF6_ATF6_ALPHA_ACTIVATES_CHAPERONES	0.159103	0.000799246
MARTORIATI_MDM4_TARGETS_FETAL_LIVER_DN	0.15895	0.000808685
SPIELMAN_LYMPHOBLAST_EUROPEAN_VS_ASIAN_DN	0.158936	0.000809579
REACTOME_FORMATION_OF_THE_CORNIFIED_ENVELOPE	0.158799	0.000818152
PID_ATF2_PATHWAY	0.158672	0.000826178
QI_HYPOXIA	0.158623	0.000829301
PUIFFE_INVASION_INHIBITED_BY_ASCITES_DN	0.158518	0.000836044
GRASEMANN_RETINOBLASTOMA_WITH_6P_AMPLIFICATION	0.158266	0.000852407
XU_GH1_AUTOCRINE_TARGETS_DN	0.158096	0.000863564
PID_EPHB_FWD_PATHWAY	0.158095	0.000863665
REACTOME_TRNA_AMINOACYLATION	0.157863	0.000879118
WACKER_HYPOXIA_TARGETS_OF_VHL	0.15777	0.000885416
RIGGINS_TAMOXIFEN_RESISTANCE_DN	0.157462	0.000906527
KOINUMA_COLON_CANCER_MSI_UP	0.157415	0.000909765
SESTO_RESPONSE_TO_UV_C0	0.157347	0.00091451
CHICAS_RB1_TARGETS_LOW_SERUM	0.157276	0.000919477
SINGH_NFE2L2_TARGETS	0.157203	0.000924656
OHM_EMBRYONIC_CARCINOMA_UP	0.15708	0.000933319
AMIT_EGF_RESPONSE_20_MCF10A	0.156822	0.000951885
REACTOME_TRANSCRIPTION_OF_THE_HIV_GENOME	0.156803	0.000953261
GAVIN_IL2_RESPONSIVE_FOXP3_TARGETS_DN	0.156788	0.000954307
TAKAO_RESPONSE_TO_UVB_RADIATION_DN	0.156751	0.000957007
COLLIS_PRKDC_REGULATORS	0.156581	0.00096944
ELVIDGE_HIF2A_TARGETS_UP	0.15657	0.000970241
REACTOME_REDUCTION_OF_CYTOSOLIC_CAPLUSPLUS_LEVELS	0.156421	0.000981307
LI_CISPLATIN_RESISTANCE_DN	0.15638	0.000984379
BIOCARTA_EIF_PATHWAY	0.156269	0.0009927
BLALOCK_ALZHEIMERS_DISEASE_DN	0.156212	0.000996979
SESTO_RESPONSE_TO_UV_C3	0.156191	0.000998605
REACTOME_SHC_MEDIATED_CASCADE:FGFR1	0.155977	0.0010149
RAO_BOUND_BY_SALL4	0.155865	0.00102361
REACTOME_DEGRADATION_OF_BETA_CATENIN_BY_THE_DESTRUCTION_COMPLEX	0.155805	0.00102821
REACTOME_HEDGEHOG_LIGAND_BIOGENESIS	0.155747	0.00103273
REACTOME_RNA_POLYMERASE_II_PRE_TRANSCRIPTION_EVENTS	0.155718	0.00103502
REACTOME_SYNTHESIS_OF_VERY_LONG_CHAIN_FATTY_ACYL_COAS	0.155579	0.00104594
DACOSTA_LOW_DOSE_UV_RESPONSE_VIA_ERCC3_XPCS_DN	0.155437	0.00105723
REACTOME_DEGRADATION_OF_DVL	0.155319	0.00106672
CREIGHTON_ENDOCRINE_THERAPY_RESISTANCE_4	0.155082	0.00108593
MYLLYKANGAS_AMPLIFICATION_HOT_SPOT_25	0.15473	0.00111509
HUMMEL_BURKITTS_LYMPHOMA_UP	0.154579	0.00112782
REACTOME_INTRINSIC_PATHWAY_FOR_APOPTOSIS	0.154556	0.00112978
MCBRYAN_PUBERTAL_BREAST_6_7WK_DN	0.154549	0.00113036
REACTOME_ACTIVATION_OF_PPARGC1A_PGC_1ALPHA_BY_PHOSPHORYLATION	0.154537	0.00113139
BLUM_RESPONSE_TO_SALIRASIB_UP	0.154525	0.00113237
MIZUKAMI_HYPOXIA_DN	0.154478	0.00113639
GARGALOVIC_RESPONSE_TO_OXIDIZED_PHOSPHOLIPIDS_BLUE_UP	0.154104	0.00116872
SEIDEN_MET_SIGNALING	0.153663	0.00120789
REACTOME_GRB2_EVENTS_IN_ERBB2_SIGNALING	0.153504	0.00122229
KIM_WT1_TARGETS_12HR_DN	0.153451	0.00122719
DORSAM_HOXA9_TARGETS_UP	0.153372	0.00123444
KOINUMA_TARGETS_OF_SMAD2_OR_SMAD3	0.153344	0.00123695
PID_NOTCH_PATHWAY	0.153318	0.00123942
REACTOME_PTEN_REGULATION	0.153291	0.00124187
STAMBOLSKY_BOUND_BY_MUTATED_TP53	0.153277	0.00124323
REACTOME_DISEASES_OF_SIGNAL_TRANSDUCTION	0.153263	0.00124453
MOOTHA_GLYCOGEN_METABOLISM	0.153233	0.00124725
LANDEMAINE_LUNG_METASTASIS	0.153213	0.00124909
KEGG_PROTEASOME	0.153129	0.00125693
BIOCARTA_STATHMIN_PATHWAY	0.153062	0.00126322
KYNG_ENVIRONMENTAL_STRESS_RESPONSE_NOT_BY_4NQO_IN_WS	0.153005	0.00126859
SCIAN_INVERSED_TARGETS_OF_TP53_AND_TP73_UP	0.152885	0.00127998
REACTOME_MUSCARINIC_ACETYLCHOLINE_RECEPTORS	0.152883	0.00128021
REACTOME_P75NTR_NEGATIVELY_REGULATES_CELL_CYCLE_VIA_SC1	0.152787	0.00128941
KIM_BIPOLAR_DISORDER_OLIGODENDROCYTE_DENSITY_CORR_DN	0.152397	0.0013272
SENESE_HDAC1_AND_HDAC2_TARGETS_UP	0.152346	0.00133224
JAIN_NFKB_SIGNALING	0.152214	0.00134537
HAHTOLA_SEZARY_SYNDROM_UP	0.15217	0.00134979
IVANOVA_HEMATOPOIESIS_LATE_PROGENITOR	0.152117	0.00135508
TANAKA_METHYLATED_IN_ESOPHAGEAL_CARCINOMA	0.152111	0.00135566
REACTOME_TRANSPORT_OF_NUCLEOTIDE_SUGARS	0.152069	0.00135987
REACTOME_HIGHLY_CALCIUM_PERMEABLE_POSTSYNAPTIC_NICOTINIC_ACETYLCHOLINE_RECEPTORS	0.151898	0.0013772
REACTOME_SIGNALING_BY_NTRK2_TRKB	0.151856	0.00138152
REACTOME_GAP_JUNCTION_ASSEMBLY	0.151761	0.0013912
VERHAAK_GLIOBLASTOMA_PRONEURAL	0.15176	0.0013913
REACTOME_INSULIN_PROCESSING	0.151527	0.00141546
LEE_SP4_THYMOCYTE	0.151091	0.0014616
FARMER_BREAST_CANCER_CLUSTER_5	0.151046	0.00146647
YANAGIHARA_ESX1_TARGETS	0.151016	0.00146977
LEE_RECENT_THYMIC_EMIGRANT	0.150976	0.00147405
REACTOME_NADE_MODULATES_DEATH_SIGNALLING	0.150806	0.00149257
BROWNE_HCMV_INFECTION_18HR_UP	0.150736	0.00150027
REACTOME_BETA_CATENIN_INDEPENDENT_WNT_SIGNALING	0.150486	0.001528
KEGG_RNA_DEGRADATION	0.150424	0.00153505
ZHANG_RESPONSE_TO_CANTHARIDIN_DN	0.150415	0.001536
IKEDA_MIR30_TARGETS_UP	0.150398	0.00153796
PID_HIF1A_PATHWAY	0.150339	0.00154455
DOANE_RESPONSE_TO_ANDROGEN_DN	0.150018	0.00158129
PID_MTOR_4PATHWAY	0.149977	0.00158607
REACTOME_STABILIZATION_OF_P53	0.149967	0.00158723
YANG_BREAST_CANCER_ESR1_BULK_DN	0.149903	0.0015947
CHARAFE_BREAST_CANCER_LUMINAL_VS_MESENCHYMAL_DN	0.149546	0.00163677
REACTOME_INTERLEUKIN_1_SIGNALING	0.14945	0.00164817
REACTOME_IRS_ACTIVATION	0.149415	0.00165242
BURTON_ADIPOGENESIS_4	0.149409	0.0016531
PETRETTO_BLOOD_PRESSURE_DN	0.149401	0.00165416
REACTOME_EGFR_TRANSACTIVATION_BY_GASTRIN	0.149387	0.0016558
REACTOME_SIGNALING_BY_FGFR2_IN_DISEASE	0.149216	0.0016765
SCHAEFFER_PROSTATE_DEVELOPMENT_6HR_DN	0.149056	0.00169615
REACTOME_ASSOCIATION_OF_TRIC_CCT_WITH_TARGET_PROTEINS_DURING_BIOSYNTHESIS	0.149043	0.00169776
PID_RHOA_PATHWAY	0.148678	0.00174328
REACTOME_SIGNALING_BY_MET	0.148581	0.00175563
REACTOME_VESICLE_MEDIATED_TRANSPORT	0.148553	0.00175921
REACTOME_DEFECTIVE_CFTR_CAUSES_CYSTIC_FIBROSIS	0.148518	0.00176364
HIRSCH_CELLULAR_TRANSFORMATION_SIGNATURE_DN	0.148121	0.00181505
REACTOME_SIGNAL_AMPLIFICATION	0.147687	0.00187283
REACTOME_ABC_TRANSPORTER_DISORDERS	0.147615	0.0018825
GROSS_HYPOXIA_VIA_HIF1A_UP	0.147605	0.00188388
AMIT_EGF_RESPONSE_240_HELA	0.147509	0.00189699
CHEOK_RESPONSE_TO_MERCAPTOPURINE_AND_HD_MTX_DN	0.147449	0.00190521
BIOCARTA_PRC2_PATHWAY	0.147386	0.00191391
ONGUSAHA_BRCA1_TARGETS_DN	0.147322	0.00192262
BOYLAN_MULTIPLE_MYELOMA_C_CLUSTER_DN	0.147149	0.00194678
IWANAGA_CARCINOGENESIS_BY_KRAS_PTEN_UP	0.14712	0.00195081
BASSO_B_LYMPHOCYTE_NETWORK	0.147117	0.00195116
AMIT_SERUM_RESPONSE_120_MCF10A	0.147085	0.00195576
MASSARWEH_RESPONSE_TO_ESTRADIOL	0.146718	0.00200787
SABATES_COLORECTAL_ADENOMA_UP	0.146692	0.00201159
BALDWIN_PRKCI_TARGETS_UP	0.146627	0.00202101
SHETH_LIVER_CANCER_VS_TXNIP_LOSS_PAM2	0.1465	0.0020394
BIOCARTA_RAS_PATHWAY	0.146483	0.00204189
SCHWAB_TARGETS_OF_BMYB_POLYMORPHIC_VARIANTS_DN	0.146432	0.00204945
REACTOME_TRNA_PROCESSING	0.146296	0.00206937
BIOCARTA_IGF1_PATHWAY	0.146264	0.0020742
REACTOME_DECTIN_1_MEDIATED_NONCANONICAL_NF_KB_SIGNALING	0.146264	0.00207422
WALLACE_PROSTATE_CANCER_RACE_DN	0.146248	0.00207647
REACTOME_HIGHLY_CALCIUM_PERMEABLE_NICOTINIC_ACETYLCHOLINE_RECEPTORS	0.146231	0.00207902
REACTOME_HSP90_CHAPERONE_CYCLE_FOR_STEROID_HORMONE_RECEPTORS_SHR	0.146173	0.00208776
VETTER_TARGETS_OF_PRKCA_AND_ETS1_UP	0.146098	0.00209894
PID_HIF2PATHWAY	0.145936	0.00212336
COATES_MACROPHAGE_M1_VS_M2_DN	0.145816	0.00214153
KUNINGER_IGF1_VS_PDGFB_TARGETS_DN	0.145797	0.00214439
REACTOME_SIGNALING_BY_NOTCH4	0.145707	0.00215824
REACTOME_ACETYLCHOLINE_BINDING_AND_DOWNSTREAM_EVENTS	0.145673	0.0021634
JACKSON_DNMT1_TARGETS_DN	0.145492	0.00219151
MATZUK_CUMULUS_EXPANSION	0.145443	0.0021992
IKEDA_MIR1_TARGETS_UP	0.145432	0.00220081
MELLMAN_TUT1_TARGETS_UP	0.145295	0.00222245
BROWNE_HCMV_INFECTION_10HR_DN	0.145254	0.00222882
KEGG_AMINOACYL_TRNA_BIOSYNTHESIS	0.145234	0.00223203
PID_TELOMERASE_PATHWAY	0.144911	0.00228382
KANG_FLUOROURACIL_RESISTANCE_DN	0.144804	0.00230116
REACTOME_PP2A_MEDIATED_DEPHOSPHORYLATION_OF_KEY_METABOLIC_FACTORS	0.144801	0.00230158
REACTOME_GLYCOGEN_METABOLISM	0.144713	0.00231605
PID_ERBB1_RECEPTOR_PROXIMAL_PATHWAY	0.14444	0.00236122
YAO_TEMPORAL_RESPONSE_TO_PROGESTERONE_CLUSTER_11	0.144431	0.00236272
KORKOLA_EMBRYONAL_CARCINOMA_UP	0.144346	0.00237679
REACTOME_RRNA_MODIFICATION_IN_THE_NUCLEUS_AND_CYTOSOL	0.1443	0.00238462
GROSS_HYPOXIA_VIA_ELK3_DN	0.144212	0.00239953
ROVERSI_GLIOMA_LOH_REGIONS	0.144197	0.002402
BILBAN_B_CLL_LPL_UP	0.144144	0.00241096
REACTOME_DEADENYLATION_DEPENDENT_MRNA_DECAY	0.144082	0.00242159
LOPES_METHYLATED_IN_COLON_CANCER_DN	0.14399	0.00243736
MATSUDA_NATURAL_KILLER_DIFFERENTIATION	0.143839	0.0024634
AMUNDSON_RESPONSE_TO_ARSENITE	0.143822	0.00246636
ROSS_AML_OF_FAB_M7_TYPE	0.143747	0.0024794
TAKADA_GASTRIC_CANCER_COPY_NUMBER_UP	0.143747	0.00247943
HARRIS_HYPOXIA	0.143385	0.00254322
MATTIOLI_MGUS_VS_MULTIPLE_MYELOMA	0.143304	0.00255779
KEGG_NICOTINATE_AND_NICOTINAMIDE_METABOLISM	0.14322	0.0025728
REACTOME_SIGNALING_BY_EGFRVIII_IN_CANCER	0.143094	0.00259575
WILLIAMS_ESR2_TARGETS_UP	0.143082	0.00259791
BLALOCK_ALZHEIMERS_DISEASE_INCIPIENT_DN	0.143036	0.00260631
REACTOME_ESTROGEN_DEPENDENT_GENE_EXPRESSION	0.143001	0.00261262
GENTILE_UV_RESPONSE_CLUSTER_D9	0.142894	0.00263229
NGUYEN_NOTCH1_TARGETS_DN	0.142803	0.00264913
REACTOME_BMAL1:CLOCK_NPAS2_ACTIVATES_CIRCADIAN_GENE_EXPRESSION	0.142759	0.00265719
CHENG_IMPRINTED_BY_ESTRADIOL	0.142688	0.00267043
ALONSO_METASTASIS_EMT_UP	0.142661	0.00267548
TOMIDA_METASTASIS_UP	0.142387	0.0027271
REACTOME_SIGNALING_BY_TGF_BETA_RECEPTOR_COMPLEX	0.142191	0.00276469
SILIGAN_TARGETS_OF_EWS_FLI1_FUSION_UP	0.14184	0.00283307
HASINA_NOL7_TARGETS_UP	0.141809	0.00283914
PID_INSULIN_PATHWAY	0.141668	0.00286713
SANSOM_APC_TARGETS_UP	0.141638	0.00287319
REACTOME_SYNTHESIS_OF_PIPS_AT_THE_LATE_ENDOSOME_MEMBRANE	0.141588	0.00288302
KEGG_PENTOSE_PHOSPHATE_PATHWAY	0.141503	0.00290016
RASHI_RESPONSE_TO_IONIZING_RADIATION_4	0.141414	0.00291816
RIZ_ERYTHROID_DIFFERENTIATION_HBZ	0.141295	0.00294218
REACTOME_FRS_MEDIATED_FGFR1_SIGNALING	0.141224	0.0029568
SAKAI_CHRONIC_HEPATITIS_VS_LIVER_CANCER_UP	0.141033	0.00299604
PID_WNT_NONCANONICAL_PATHWAY	0.140953	0.00301283
BIOCARTA_FAS_PATHWAY	0.140942	0.00301512
REACTOME_AUF1_HNRNP_D0_BINDS_AND_DESTABILIZES_MRNA	0.140792	0.00304654
REACTOME_METABOLISM_OF_NUCLEOTIDES	0.140746	0.00305612
MARIADASON_RESPONSE_TO_CURCUMIN_SULINDAC_5	0.140725	0.00306056
IYENGAR_RESPONSE_TO_ADIPOCYTE_FACTORS	0.140713	0.00306319
JI_CARCINOGENESIS_BY_KRAS_AND_STK11_UP	0.140491	0.00311029
REACTOME_N_GLYCAN_ANTENNAE_ELONGATION_IN_THE_MEDIAL_TRANS_GOLGI	0.140441	0.00312118
REACTOME_GLUCURONIDATION	0.140263	0.00315969
REACTOME_BETA_CATENIN_PHOSPHORYLATION_CASCADE	0.14026	0.0031602
REACTOME_REGULATION_OF_MRNA_STABILITY_BY_PROTEINS_THAT_BIND_AU_RICH_ELEMENTS	0.140251	0.00316216
REACTOME_TRANSPORT_OF_CONNEXONS_TO_THE_PLASMA_MEMBRANE	0.140231	0.00316656
REACTOME_NEGATIVE_REGULATION_OF_NOTCH4_SIGNALING	0.140099	0.00319551
ZHENG_RESPONSE_TO_ARSENITE_DN	0.139564	0.00331495
GENTILE_UV_RESPONSE_CLUSTER_D2	0.139384	0.00335616
BIOCARTA_PARKIN_PATHWAY	0.138931	0.00346169
GAUSSMANN_MLL_AF4_FUSION_TARGETS_A_UP	0.138819	0.0034883
ABDELMOHSEN_ELAVL4_TARGETS	0.138805	0.00349149
JACKSON_DNMT1_TARGETS_UP	0.138799	0.00349287
ZHAN_MULTIPLE_MYELOMA_MS_UP	0.138698	0.00351706
WEINMANN_ADAPTATION_TO_HYPOXIA_DN	0.138697	0.0035173
VANDESLUIS_COMMD1_TARGETS_GROUP_2_UP	0.138628	0.00353384
BILD_CTNNB1_ONCOGENIC_SIGNATURE	0.138599	0.00354079
AZARE_STAT3_TARGETS	0.138366	0.00359745
REACTOME_PERK_REGULATES_GENE_EXPRESSION	0.138227	0.00363174
REACTOME_PYRUVATE_METABOLISM	0.13812	0.00365804
HERNANDEZ_ABERRANT_MITOSIS_BY_DOCETACEL_4NM_DN	0.138093	0.00366496
REACTOME_MTORC1_MEDIATED_SIGNALLING	0.138075	0.00366922
KEGG_BASE_EXCISION_REPAIR	0.138049	0.00367582
REACTOME_SIGNALING_BY_LIGAND_RESPONSIVE_EGFR_VARIANTS_IN_CANCER	0.138009	0.0036858
MOOTHA_PYR	0.137987	0.00369125
REACTOME_SIGNALING_BY_TGF_BETA_FAMILY_MEMBERS	0.137937	0.00370391
MYLLYKANGAS_AMPLIFICATION_HOT_SPOT_30	0.137788	0.00374133
REACTOME_SMAD2_SMAD3:SMAD4_HETEROTRIMER_REGULATES_TRANSCRIPTION	0.137758	0.00374903
NAM_FXYD5_TARGETS_DN	0.137758	0.00374916
DACOSTA_UV_RESPONSE_VIA_ERCC3_XPCS_DN	0.137388	0.00384414
REACTOME_RUNX1_REGULATES_TRANSCRIPTION_OF_GENES_INVOLVED_IN_DIFFERENTIATION_OF_KERATINOCYTES	0.13728	0.00387226
DORN_ADENOVIRUS_INFECTION_12HR_DN	0.137196	0.00389416
VERRECCHIA_RESPONSE_TO_TGFB1_C5	0.137188	0.00389641
BROWNE_HCMV_INFECTION_6HR_DN	0.137085	0.00392368
SHARMA_PILOCYTIC_ASTROCYTOMA_LOCATION_UP	0.137046	0.00393379
WATANABE_COLON_CANCER_MSI_VS_MSS_UP	0.137008	0.00394397
AMIT_SERUM_RESPONSE_240_MCF10A	0.136929	0.00396495
GARGALOVIC_RESPONSE_TO_OXIDIZED_PHOSPHOLIPIDS_TAN_DN	0.136685	0.0040306
REACTOME_EARLY_PHASE_OF_HIV_LIFE_CYCLE	0.136492	0.00408346
REACTOME_PROTEIN_FOLDING	0.136247	0.00415116
REACTOME_ASPARTATE_AND_ASPARAGINE_METABOLISM	0.136235	0.00415451
KEGG_RENAL_CELL_CARCINOMA	0.136079	0.00419805
PEDERSEN_TARGETS_OF_611CTF_ISOFORM_OF_ERBB2	0.136047	0.00420718
REACTOME_METABOLISM_OF_POLYAMINES	0.135713	0.00430241
KEGG_CYSTEINE_AND_METHIONINE_METABOLISM	0.135605	0.00433357
BIOCARTA_RNAPOL3_PATHWAY	0.135541	0.00435207
REACTOME_METABOLISM_OF_RNA	0.135468	0.00437333
HUPER_BREAST_BASAL_VS_LUMINAL_UP	0.135131	0.00447273
KENNY_CTNNB1_TARGETS_UP	0.135065	0.00449247
SHEN_SMARCA2_TARGETS_UP	0.134908	0.00453967
BARRIER_CANCER_RELAPSE_TUMOR_SAMPLE_UP	0.13483	0.00456303
SARTIPY_NORMAL_AT_INSULIN_RESISTANCE_UP	0.134657	0.00461598
REACTOME_RNA_POLYMERASE_I_PROMOTER_ESCAPE	0.134637	0.004622
TERAO_AOX4_TARGETS_HG_UP	0.134613	0.00462943
PID_ARF6_DOWNSTREAM_PATHWAY	0.134388	0.00469911
REACTOME_DEGRADATION_OF_AXIN	0.134221	0.00475128
KOBAYASHI_RESPONSE_TO_ROMIDEPSIN	0.134181	0.00476387
GARGALOVIC_RESPONSE_TO_OXIDIZED_PHOSPHOLIPIDS_LIGHTYELLOW_UP	0.134069	0.00479934
REACTOME_FCERI_MEDIATED_NF_KB_ACTIVATION	0.13395	0.00483729
WEST_ADRENOCORTICAL_CARCINOMA_VS_ADENOMA_UP	0.133928	0.00484431
CHANDRAN_METASTASIS_TOP50_UP	0.13392	0.00484677
REACTOME_RNA_POLYMERASE_II_TRANSCRIPTION_PRE_INITIATION_AND_PROMOTER_OPENING	0.133918	0.00484745
RIZ_ERYTHROID_DIFFERENTIATION_CCNE1	0.133916	0.00484806
SHIRAISHI_PLZF_TARGETS_DN	0.133897	0.00485426
SCHAEFFER_PROSTATE_DEVELOPMENT_AND_CANCER_BOX5_DN	0.133593	0.00495256
ALONSO_METASTASIS_UP	0.133537	0.0049709
REACTOME_TRANSCRIPTIONAL_ACTIVITY_OF_SMAD2_SMAD3:SMAD4_HETEROTRIMER	0.133478	0.00499045
MARTINEZ_RESPONSE_TO_TRABECTEDIN	0.133464	0.00499511
NEBEN_AML_WITH_FLT3_OR_NRAS_DN	0.133461	0.00499585
DISTECHE_ESCAPED_FROM_X_INACTIVATION	0.133319	0.00504303
HAHTOLA_CTCL_CUTANEOUS	0.133309	0.00504612
REACTOME_ABACAVIR_METABOLISM	0.133101	0.00511586
REACTOME_APOPTOSIS_INDUCED_DNA_FRAGMENTATION	0.132939	0.00517031
DEN_INTERACT_WITH_LCA5	0.132881	0.00519018
REACTOME_ZINC_EFFLUX_AND_COMPARTMENTALIZATION_BY_THE_SLC30_FAMILY	0.132859	0.00519777
LOPEZ_MESOTHELIOMA_SURVIVAL_DN	0.132824	0.00520951
REACTOME_SYNTHESIS_OF_PIPS_AT_THE_EARLY_ENDOSOME_MEMBRANE	0.132714	0.00524728
KRISHNAN_FURIN_TARGETS_UP	0.132713	0.00524778
TONKS_TARGETS_OF_RUNX1_RUNX1T1_FUSION_MONOCYTE_UP	0.132687	0.00525659
ROY_WOUND_BLOOD_VESSEL_DN	0.132596	0.005288
REACTOME_VIF_MEDIATED_DEGRADATION_OF_APOBEC3G	0.132586	0.00529173
PID_INTEGRIN4_PATHWAY	0.132361	0.0053702
WANG_RESPONSE_TO_BEXAROTENE_DN	0.132347	0.00537491
ZWANG_EGF_INTERVAL_UP	0.132317	0.00538561
IIZUKA_LIVER_CANCER_PROGRESSION_G1_G2_DN	0.132294	0.00539382
KORKOLA_YOLK_SAC_TUMOR_UP	0.13227	0.0054023
RASHI_RESPONSE_TO_IONIZING_RADIATION_5	0.132229	0.00541677
BOYLAN_MULTIPLE_MYELOMA_PCA3_UP	0.132205	0.00542516
REACTOME_MITOCHONDRIAL_CALCIUM_ION_TRANSPORT	0.132196	0.00542828
REACTOME_MET_PROMOTES_CELL_MOTILITY	0.132129	0.00545232
BIOCARTA_CHREBP_PATHWAY	0.132015	0.00549277
MACLACHLAN_BRCA1_TARGETS_UP	0.131859	0.0055491
MODY_HIPPOCAMPUS_NEONATAL	0.131834	0.00555829
KYNG_ENVIRONMENTAL_STRESS_RESPONSE_NOT_BY_GAMMA_IN_OLD	0.131833	0.00555867
KORKOLA_CHORIOCARCINOMA_UP	0.131792	0.00557323
BIOCARTA_CPSF_PATHWAY	0.131542	0.00566488
REACTOME_SIRT1_NEGATIVELY_REGULATES_RRNA_EXPRESSION	0.131491	0.00568378
WENDT_COHESIN_TARGETS_UP	0.131483	0.00568654
FARDIN_HYPOXIA_11	0.131273	0.00576492
PRAMOONJAGO_SOX4_TARGETS_UP	0.130894	0.00590836
PACHER_TARGETS_OF_IGF1_AND_IGF2_UP	0.13078	0.00595219
YAO_TEMPORAL_RESPONSE_TO_PROGESTERONE_CLUSTER_4	0.130736	0.00596908
JAZAERI_BREAST_CANCER_BRCA1_VS_BRCA2_UP	0.130575	0.00603175
WALLACE_PROSTATE_CANCER_DN	0.130573	0.00603233
REACTOME_SIGNALING_BY_ERBB4	0.130359	0.00611649
PURBEY_TARGETS_OF_CTBP1_AND_SATB1_UP	0.130341	0.00612352
FARMER_BREAST_CANCER_CLUSTER_3	0.130284	0.0061462
FIRESTEIN_CTNNB1_PATHWAY	0.130091	0.00622296
TERAMOTO_OPN_TARGETS_CLUSTER_3	0.130004	0.00625816
HINATA_NFKB_TARGETS_FIBROBLAST_UP	0.129871	0.00631202
MIKKELSEN_DEDIFFERENTIATED_STATE_UP	0.129801	0.00634039
REACTOME_SIGNALING_BY_HIPPO	0.12966	0.00639799
WANG_TARGETS_OF_MLL_CBP_FUSION_DN	0.129651	0.00640169
WANG_RESPONSE_TO_FORSKOLIN_UP	0.129613	0.00641724
REACTOME_PROCESSING_OF_CAPPED_INTRON_CONTAINING_PRE_MRNA	0.129528	0.00645245
BROWN_MYELOID_CELL_DEVELOPMENT_DN	0.129452	0.00648432
MILI_PSEUDOPODIA_CHEMOTAXIS_UP	0.129318	0.00654016
MENSE_HYPOXIA_UP	0.129221	0.00658097
JIANG_HYPOXIA_VIA_VHL	0.129177	0.00659958
REACTOME_OVARIAN_TUMOR_DOMAIN_PROTEASES	0.128622	0.00683808
SEMENZA_HIF1_TARGETS	0.128537	0.00687505
REACTOME_SHC_MEDIATED_CASCADE:FGFR4	0.128418	0.00692729
GROSS_HYPOXIA_VIA_ELK3_AND_HIF1A_UP	0.128199	0.00702494
REACTOME_ADP_SIGNALLING_THROUGH_P2Y_PURINOCEPTOR_12	0.128178	0.00703428
MEISSNER_BRAIN_HCP_WITH_H3_UNMETHYLATED	0.128159	0.00704257
BIOCARTA_SALMONELLA_PATHWAY	0.128074	0.00708062
BIOCARTA_SM_PATHWAY	0.128074	0.00708064
RICKMAN_HEAD_AND_NECK_CANCER_A	0.128015	0.00710756
REACTOME_CREB1_PHOSPHORYLATION_THROUGH_THE_ACTIVATION_OF_CAMKII_CAMKK_CAMKIV_CASCASDE	0.127996	0.00711599
AKL_HTLV1_INFECTION_UP	0.127965	0.00713014
SCHLOSSER_MYC_TARGETS_AND_SERUM_RESPONSE_UP	0.127829	0.00719171
REACTOME_INFECTIOUS_DISEASE	0.127698	0.00725215
KAYO_AGING_MUSCLE_DN	0.127606	0.00729432
GAUSSMANN_MLL_AF4_FUSION_TARGETS_E_DN	0.127487	0.00734966
MIKKELSEN_ES_HCP_WITH_H3_UNMETHYLATED	0.127449	0.00736753
BIOCARTA_ERBB3_PATHWAY	0.127328	0.00742418
REACTOME_CROSS_PRESENTATION_OF_SOLUBLE_EXOGENOUS_ANTIGENS_ENDOSOMES	0.127314	0.00743053
TSENG_IRS1_TARGETS_UP	0.127262	0.0074551
CAIRO_LIVER_DEVELOPMENT_UP	0.127238	0.00746637
YAMASHITA_LIVER_CANCER_STEM_CELL_UP	0.12722	0.00747488
MARTORIATI_MDM4_TARGETS_FETAL_LIVER_UP	0.127015	0.00757242
LEE_CALORIE_RESTRICTION_NEOCORTEX_DN	0.12694	0.00760828
SATO_SILENCED_EPIGENETICALLY_IN_PANCREATIC_CANCER	0.126903	0.00762607
PID_BETA_CATENIN_NUC_PATHWAY	0.126866	0.00764387
REACTOME_SHC_MEDIATED_CASCADE:FGFR3	0.126826	0.00766308
REACTOME_SHC1_EVENTS_IN_EGFR_SIGNALING	0.126806	0.00767259
VERRECCHIA_RESPONSE_TO_TGFB1_C1	0.12633	0.00790615
COLLER_MYC_TARGETS_UP	0.12628	0.0079313
BROWNE_HCMV_INFECTION_4HR_UP	0.126128	0.00800724
PID_AR_PATHWAY	0.125953	0.00809532
REACTOME_ACTIVATED_TAK1_MEDIATES_P38_MAPK_ACTIVATION	0.125874	0.00813548
REACTOME_POU5F1_OCT4_SOX2_NANOG_REPRESS_GENES_RELATED_TO_DIFFERENTIATION	0.125799	0.00817395
SANSOM_APC_TARGETS	0.125764	0.00819179
KEGG_PANCREATIC_CANCER	0.125759	0.00819428
REACTOME_SIGNALING_BY_ACTIVIN	0.125279	0.00844401
SASAI_TARGETS_OF_CXCR6_AND_PTCH1_DN	0.125253	0.00845771
SHIN_B_CELL_LYMPHOMA_CLUSTER_6	0.125182	0.00849511
YIH_RESPONSE_TO_ARSENITE_C2	0.125117	0.00853011
PID_PS1_PATHWAY	0.125035	0.00857375
BOYLAN_MULTIPLE_MYELOMA_C_DN	0.124979	0.00860333
BIOCARTA_P35ALZHEIMERS_PATHWAY	0.124874	0.00865975
REACTOME_C_TYPE_LECTIN_RECEPTORS_CLRS	0.124853	0.00867133
REACTOME_PURINE_SALVAGE	0.124816	0.00869114
REACTOME_RECYCLING_OF_EIF2:GDP	0.124762	0.00872027
FUJIWARA_PARK2_IN_LIVER_CANCER_UP	0.124757	0.00872338
SIMBULAN_UV_RESPONSE_IMMORTALIZED_DN	0.124739	0.00873279
SPIRA_SMOKERS_LUNG_CANCER_DN	0.124689	0.00876031
REACTOME_SHC_MEDIATED_CASCADE:FGFR2	0.124536	0.00884383
BIOCARTA_MCALPAIN_PATHWAY	0.12446	0.00888549
SU_PANCREAS	0.124458	0.00888673
GHANDHI_DIRECT_IRRADIATION_UP	0.124375	0.00893286
JIANG_VHL_TARGETS	0.124319	0.00896383
CHANG_IMMORTALIZED_BY_HPV31_UP	0.124263	0.00899489
KIM_ALL_DISORDERS_CALB1_CORR_UP	0.124134	0.00906685
REACTOME_INTERLEUKIN_12_FAMILY_SIGNALING	0.124048	0.00911552
REACTOME_REGULATION_OF_RUNX3_EXPRESSION_AND_ACTIVITY	0.123953	0.00916932
CHOI_ATL_STAGE_PREDICTOR	0.123792	0.00926113
REACTOME_METABOLISM_OF_FOLATE_AND_PTERINES	0.123722	0.0093011
CERVERA_SDHB_TARGETS_2	0.123507	0.00942497
REACTOME_SIGNALING_BY_NOTCH2	0.123421	0.00947519
REACTOME_INTERCONVERSION_OF_NUCLEOTIDE_DI_AND_TRIPHOSPHATES	0.12329	0.00955215
REACTOME_RHO_GTPASES_ACTIVATE_IQGAPS	0.123208	0.00960012
BRUECKNER_TARGETS_OF_MIRLET7A3_DN	0.123191	0.00961048
KEGG_GLYOXYLATE_AND_DICARBOXYLATE_METABOLISM	0.123173	0.00962103
OSMAN_BLADDER_CANCER_UP	0.123127	0.00964811
REACTOME_REGULATION_OF_LIPID_METABOLISM_BY_PEROXISOME_PROLIFERATOR_ACTIVATED_RECEPTOR_ALPHA_PPARALPHA	0.12285	0.00981394
SA_TRKA_RECEPTOR	0.122757	0.00987019
REACTOME_PREFOLDIN_MEDIATED_TRANSFER_OF_SUBSTRATE_TO_CCT_TRIC	0.122682	0.00991535
REACTOME_FORMATION_OF_INCISION_COMPLEX_IN_GG_NER	0.122611	0.009959
WANG_TUMOR_INVASIVENESS_UP	0.122602	0.00996429
BROWNE_HCMV_INFECTION_1HR_DN	0.122551	0.00999569
REACTOME_REGULATION_OF_LOCALIZATION_OF_FOXO_TRANSCRIPTION_FACTORS	0.122443	0.010062
REACTOME_CYTOSOLIC_TRNA_AMINOACYLATION	0.122416	0.0100786
XU_CREBBP_TARGETS_UP	0.122194	0.0102165
VERRECCHIA_DELAYED_RESPONSE_TO_TGFB1	0.12219	0.0102189
BIOCARTA_SPPA_PATHWAY	0.121965	0.0103598
CHARAFE_BREAST_CANCER_LUMINAL_VS_BASAL_DN	0.121815	0.0104553
PID_ERBB1_INTERNALIZATION_PATHWAY	0.121802	0.0104636
NOUZOVA_TRETINOIN_AND_H4_ACETYLATION	0.121714	0.0105197
REACTOME_POU5F1_OCT4_SOX2_NANOG_ACTIVATE_GENES_RELATED_TO_PROLIFERATION	0.121695	0.0105319
CAIRO_PML_TARGETS_BOUND_BY_MYC_UP	0.121692	0.0105341
MARSON_BOUND_BY_FOXP3_UNSTIMULATED	0.121615	0.0105831
LEE_LIVER_CANCER_E2F1_DN	0.121606	0.0105891
KORKOLA_TERATOMA	0.121503	0.010656
JAATINEN_HEMATOPOIETIC_STEM_CELL_UP	0.121464	0.0106811
REACTOME_FATTY_ACYL_COA_BIOSYNTHESIS	0.121332	0.0107673
GARGALOVIC_RESPONSE_TO_OXIDIZED_PHOSPHOLIPIDS_GREEN_DN	0.121228	0.0108351
TSAI_DNAJB4_TARGETS_DN	0.120753	0.0111514
XU_HGF_TARGETS_REPRESSED_BY_AKT1_UP	0.120727	0.0111694
HOSHIDA_LIVER_CANCER_LATE_RECURRENCE_UP	0.120712	0.0111796
CHARAFE_BREAST_CANCER_BASAL_VS_MESENCHYMAL_DN	0.12063	0.011235
KEGG_GAP_JUNCTION	0.120584	0.0112661
HAHTOLA_MYCOSIS_FUNGOIDES_UP	0.120534	0.0113004
REACTOME_CLEC7A_DECTIN_1_SIGNALING	0.120515	0.0113136
PELLICCIOTTA_HDAC_IN_ANTIGEN_PRESENTATION_DN	0.120412	0.0113842
ZWANG_EGF_PERSISTENTLY_UP	0.12041	0.0113852
YAO_TEMPORAL_RESPONSE_TO_PROGESTERONE_CLUSTER_10	0.120263	0.0114867
REACTOME_ACTIVATION_OF_RAS_IN_B_CELLS	0.120255	0.011492
REACTOME_VEGFR2_MEDIATED_VASCULAR_PERMEABILITY	0.1202	0.0115303
KIM_PTEN_TARGETS_DN	0.120138	0.0115732
LIU_CMYB_TARGETS_DN	0.120019	0.0116564
BYSTRYKH_HEMATOPOIESIS_STEM_CELL_FLI1	0.119981	0.0116833
KEGG_STARCH_AND_SUCROSE_METABOLISM	0.119758	0.011841
KEGG_MELANOMA	0.119755	0.0118431
KRIGE_AMINO_ACID_DEPRIVATION	0.119652	0.0119166
BIOCARTA_PLK3_PATHWAY	0.119446	0.0120652
BURTON_ADIPOGENESIS_11	0.119418	0.0120852
REACTOME_GLYOXYLATE_METABOLISM_AND_GLYCINE_DEGRADATION	0.119276	0.0121882
REACTOME_APOPTOTIC_CLEAVAGE_OF_CELL_ADHESION_PROTEINS	0.119145	0.0122844
BIOCARTA_INSULIN_PATHWAY	0.118988	0.0124003
REACTOME_SIGNALING_BY_FGFR3_FUSIONS_IN_CANCER	0.118971	0.0124131
BOYAULT_LIVER_CANCER_SUBCLASS_G12_UP	0.118962	0.0124193
GABRIELY_MIR21_TARGETS	0.118845	0.0125064
REACTOME_OAS_ANTIVIRAL_RESPONSE	0.118748	0.0125795
CHOI_ATL_CHRONIC_VS_ACUTE_DN	0.11869	0.0126231
TURASHVILI_BREAST_CARCINOMA_DUCTAL_VS_LOBULAR_DN	0.118645	0.0126569
SEITZ_NEOPLASTIC_TRANSFORMATION_BY_8P_DELETION_DN	0.11862	0.0126758
BERENJENO_TRANSFORMED_BY_RHOA_FOREVER_DN	0.118463	0.0127945
MARSHALL_VIRAL_INFECTION_RESPONSE_DN	0.118442	0.0128103
REACTOME_COOPERATION_OF_PREFOLDIN_AND_TRIC_CCT_IN_ACTIN_AND_TUBULIN_FOLDING	0.118382	0.0128567
REACTOME_GAP_JUNCTION_TRAFFICKING_AND_REGULATION	0.118241	0.0129644
REACTOME_DISEASE	0.118006	0.0131471
CERVERA_SDHB_TARGETS_1_DN	0.117973	0.0131726
REACTOME_DOWNSTREAM_SIGNALING_OF_ACTIVATED_FGFR1	0.117938	0.0132004
KYNG_WERNER_SYNDROM_AND_NORMAL_AGING_UP	0.117812	0.0132993
SHIPP_DLBCL_CURED_VS_FATAL_DN	0.117801	0.0133078
BIOCARTA_RANBP2_PATHWAY	0.117687	0.0133976
NIKOLSKY_BREAST_CANCER_8P12_P11_AMPLICON	0.117636	0.0134385
REACTOME_RNA_POLYMERASE_II_TRANSCRIPTION_TERMINATION	0.11758	0.0134833
PID_CMYB_PATHWAY	0.117537	0.0135177
RICKMAN_METASTASIS_UP	0.117434	0.0135998
MILI_PSEUDOPODIA	0.117377	0.013646
REACTOME_MITOPHAGY	0.117347	0.0136698
LANDIS_ERBB2_BREAST_TUMORS_324_UP	0.117325	0.013688
REACTOME_UBIQUINOL_BIOSYNTHESIS	0.116999	0.0139532
REACTOME_NEGATIVE_REGULATION_OF_TCF_DEPENDENT_SIGNALING_BY_WNT_LIGAND_ANTAGONISTS	0.11678	0.0141351
RODRIGUES_THYROID_CARCINOMA_DN	0.116775	0.0141386
XU_GH1_AUTOCRINE_TARGETS_UP	0.116773	0.0141403
REACTOME_TYPE_I_HEMIDESMOSOME_ASSEMBLY	0.116768	0.0141451
REACTOME_JNK_C_JUN_KINASES_PHOSPHORYLATION_AND_ACTIVATION_MEDIATED_BY_ACTIVATED_HUMAN_TAK1	0.11669	0.0142098
WINZEN_DEGRADED_VIA_KHSRP	0.116579	0.0143028
REACTOME_ACTIVATED_NTRK2_SIGNALS_THROUGH_CDK5	0.116531	0.0143435
PHONG_TNF_RESPONSE_VIA_P38_COMPLETE	0.116476	0.0143895
AZARE_NEOPLASTIC_TRANSFORMATION_BY_STAT3_UP	0.116443	0.0144171
ELVIDGE_HIF1A_AND_HIF2A_TARGETS_UP	0.116395	0.0144582
COLLIS_PRKDC_SUBSTRATES	0.116311	0.0145294
LIN_MELANOMA_COPY_NUMBER_DN	0.116294	0.0145436
SATO_SILENCED_BY_METHYLATION_IN_PANCREATIC_CANCER_2	0.116285	0.0145517
YOSHIMURA_MAPK8_TARGETS_DN	0.116081	0.0147268
BAE_BRCA1_TARGETS_DN	0.116049	0.0147546
KEGG_PATHWAYS_IN_CANCER	0.116029	0.0147711
GAUSSMANN_MLL_AF4_FUSION_TARGETS_D_UP	0.115825	0.0149488
BURTON_ADIPOGENESIS_12	0.115683	0.0150729
POS_RESPONSE_TO_HISTAMINE_DN	0.115331	0.0153862
REACTOME_NUCLEOTIDE_SALVAGE	0.115317	0.0153981
REACTOME_DEPURINATION	0.115097	0.0155968
PID_S1P_META_PATHWAY	0.115066	0.0156251
MAINA_HYPOXIA_VHL_TARGETS_UP	0.11499	0.0156943
REACTOME_MRNA_CAPPING	0.114716	0.0159458
MIYAGAWA_TARGETS_OF_EWSR1_ETS_FUSIONS_DN	0.114562	0.0160887
YAMASHITA_LIVER_CANCER_WITH_EPCAM_UP	0.11456	0.0160904
BIOCARTA_EXTRINSIC_PATHWAY	0.114486	0.0161591
KEGG_SPLICEOSOME	0.114471	0.016173
REACTOME_GALACTOSE_CATABOLISM	0.114365	0.0162733
GAUSSMANN_MLL_AF4_FUSION_TARGETS_D_DN	0.114315	0.0163197
PID_RETINOIC_ACID_PATHWAY	0.114235	0.0163957
REACTOME_METABOLISM_OF_COFACTORS	0.114234	0.0163962
WANG_RESPONSE_TO_ANDROGEN_UP	0.114051	0.0165705
REACTOME_G_PROTEIN_ACTIVATION	0.113888	0.0167273
SATO_SILENCED_BY_DEACETYLATION_IN_PANCREATIC_CANCER	0.113711	0.0168991
REACTOME_SIGNALING_BY_FGFR4_IN_DISEASE	0.11359	0.017017
REACTOME_ZINC_TRANSPORTERS	0.113493	0.0171118
BIOCARTA_S1P_PATHWAY	0.113269	0.0173332
CEBALLOS_TARGETS_OF_TP53_AND_MYC_DN	0.113179	0.0174227
REACTOME_CELLULAR_HEXOSE_TRANSPORT	0.113177	0.0174247
REACTOME_DEVELOPMENTAL_BIOLOGY	0.113168	0.0174336
REACTOME_GOLGI_ASSOCIATED_VESICLE_BIOGENESIS	0.113115	0.0174868
KOYAMA_SEMA3B_TARGETS_DN	0.113085	0.0175174
LIU_VAV3_PROSTATE_CARCINOGENESIS_DN	0.113003	0.0175991
CHESLER_BRAIN_QTL_TRANS	0.112978	0.0176249
ZHAN_MULTIPLE_MYELOMA_CD1_VS_CD2_UP	0.112834	0.0177707
REACTOME_FRS_MEDIATED_FGFR2_SIGNALING	0.112689	0.0179181
REACTOME_FRS_MEDIATED_FGFR4_SIGNALING	0.112543	0.0180682
PILON_KLF1_TARGETS_UP	0.112539	0.0180729
PEDRIOLI_MIR31_TARGETS_UP	0.112362	0.0182562
BAKER_HEMATOPOIESIS_STAT3_TARGETS	0.112117	0.0185127
FUJIWARA_PARK2_HEPATOCYTE_PROLIFERATION_UP	0.112073	0.0185592
BOYLAN_MULTIPLE_MYELOMA_C_UP	0.112004	0.0186318
REACTOME_RNA_POLYMERASE_I_TRANSCRIPTION	0.111862	0.0187825
PID_DNA_PK_PATHWAY	0.111719	0.0189363
REACTOME_RNA_POLYMERASE_II_TRANSCRIPTION_ELONGATION	0.111553	0.0191147
AUJLA_IL22_AND_IL17A_SIGNALING	0.111437	0.0192404
DASU_IL6_SIGNALING_DN	0.11128	0.0194129
REACTOME_SUMOYLATION_OF_DNA_METHYLATION_PROTEINS	0.111229	0.0194682
REACTOME_FRS_MEDIATED_FGFR3_SIGNALING	0.111142	0.019565
REACTOME_SIGNALING_BY_EGFR	0.111107	0.0196031
WINTER_HYPOXIA_METAGENE	0.111089	0.0196238
JOHNSTONE_PARVB_TARGETS_1_DN	0.111087	0.0196253
PID_WNT_SIGNALING_PATHWAY	0.111043	0.0196741
ZHU_CMV_ALL_UP	0.110829	0.0199129
REACTOME_DOWNREGULATION_OF_ERBB4_SIGNALING	0.110806	0.0199389
RAFFEL_VEGFA_TARGETS_UP	0.110681	0.02008
BURTON_ADIPOGENESIS_10	0.110655	0.0201091
LASTOWSKA_NEUROBLASTOMA_COPY_NUMBER_UP	0.11064	0.0201264
VANASSE_BCL2_TARGETS_DN	0.110587	0.0201868
REACTOME_FORMATION_OF_TUBULIN_FOLDING_INTERMEDIATES_BY_CCT_TRIC	0.110584	0.0201902
KEGG_AMYOTROPHIC_LATERAL_SCLEROSIS_ALS	0.110567	0.0202093
KEGG_RIBOFLAVIN_METABOLISM	0.11055	0.0202289
PID_ER_NONGENOMIC_PATHWAY	0.110509	0.0202752
HOLLEMAN_PREDNISOLONE_RESISTANCE_ALL_UP	0.110506	0.0202785
WU_HBX_TARGETS_3_UP	0.110494	0.0202928
REACTOME_ACTIVATED_PKN1_STIMULATES_TRANSCRIPTION_OF_AR_ANDROGEN_RECEPTOR_REGULATED_GENES_KLK2_AND_KLK3	0.110461	0.0203297
RIZ_ERYTHROID_DIFFERENTIATION_HEMGN	0.110378	0.0204251
BIOCARTA_NDKDYNAMIN_PATHWAY	0.110268	0.0205512
REACTOME_PYRIMIDINE_SALVAGE	0.110104	0.020742
KOKKINAKIS_METHIONINE_DEPRIVATION_48HR_DN	0.109856	0.0210311
HOLLEMAN_PREDNISOLONE_RESISTANCE_B_ALL_UP	0.109839	0.0210513
REACTOME_ACTIVATED_NTRK3_SIGNALS_THROUGH_PI3K	0.109828	0.021064
REACTOME_VITAMIN_C_ASCORBATE_METABOLISM	0.109361	0.0216218
ZWANG_CLASS_1_TRANSIENTLY_INDUCED_BY_EGF	0.1093	0.0216954
MORI_PLASMA_CELL_UP	0.109269	0.0217323
ZHU_CMV_24_HR_UP	0.109249	0.0217567
PID_INTEGRIN5_PATHWAY	0.109087	0.0219542
REACTOME_VASOPRESSIN_LIKE_RECEPTORS	0.109048	0.0220012
REACTOME_BASE_EXCISION_REPAIR_AP_SITE_FORMATION	0.108909	0.0221725
REACTOME_NUCLEOBASE_BIOSYNTHESIS	0.108899	0.0221842
CHIN_BREAST_CANCER_COPY_NUMBER_DN	0.108878	0.0222099
GUO_TARGETS_OF_IRS1_AND_IRS2	0.108701	0.0224301
REACTOME_SIGNALING_BY_EGFR_IN_CANCER	0.108694	0.0224382
PID_CDC42_PATHWAY	0.108688	0.0224459
KORKOLA_SEMINOMA_UP	0.108676	0.0224614
HE_PTEN_TARGETS_UP	0.108562	0.0226034
BIOCARTA_TUBBY_PATHWAY	0.108549	0.0226196
REACTOME_REGULATION_OF_PYRUVATE_DEHYDROGENASE_PDH_COMPLEX	0.108491	0.0226929
REACTOME_POSITIVE_EPIGENETIC_REGULATION_OF_RRNA_EXPRESSION	0.108309	0.0229225
ELVIDGE_HYPOXIA_BY_DMOG_UP	0.108158	0.0231139
REACTOME_PURINE_RIBONUCLEOSIDE_MONOPHOSPHATE_BIOSYNTHESIS	0.107971	0.0233548
EHRLICH_ICF_SYNDROM_UP	0.107886	0.023464
REACTOME_APOBEC3G_MEDIATED_RESISTANCE_TO_HIV_1_INFECTION	0.107821	0.0235477
REACTOME_RNA_POLYMERASE_I_TRANSCRIPTION_TERMINATION	0.107589	0.0238514
KEGG_GALACTOSE_METABOLISM	0.107433	0.0240566
REACTOME_DOWNSTREAM_SIGNAL_TRANSDUCTION	0.107412	0.0240839
BIOCARTA_LEPTIN_PATHWAY	0.107345	0.0241732
SHETH_LIVER_CANCER_VS_TXNIP_LOSS_PAM5	0.107242	0.0243105
FAELT_B_CLL_WITH_VH_REARRANGEMENTS_DN	0.107026	0.0245999
REACTOME_LINOLEIC_ACID_LA_METABOLISM	0.106996	0.0246405
OUYANG_PROSTATE_CANCER_MARKERS	0.106829	0.0248666
BIOCARTA_RANKL_PATHWAY	0.106798	0.0249094
REACTOME_DOWNSTREAM_SIGNALING_OF_ACTIVATED_FGFR4	0.106765	0.0249534
REACTOME_PHOSPHORYLATION_SITE_MUTANTS_OF_CTNNB1_ARE_NOT_TARGETED_TO_THE_PROTEASOME_BY_THE_DESTRUCTION_COMPLEX	0.106688	0.0250595
ELVIDGE_HIF1A_TARGETS_DN	0.106606	0.0251712
REACTOME_ERCC6_CSB_AND_EHMT2_G9A_POSITIVELY_REGULATE_RRNA_EXPRESSION	0.106549	0.0252509
REACTOME_INTRACELLULAR_SIGNALING_BY_SECOND_MESSENGERS	0.106545	0.0252554
DACOSTA_UV_RESPONSE_VIA_ERCC3_XPCS_UP	0.106528	0.0252795
GARGALOVIC_RESPONSE_TO_OXIDIZED_PHOSPHOLIPIDS_CYAN_UP	0.106422	0.0254254
REACTOME_NOD1_2_SIGNALING_PATHWAY	0.106268	0.0256407
REACTOME_MAPK_FAMILY_SIGNALING_CASCADES	0.106258	0.0256548
ZHAN_V2_LATE_DIFFERENTIATION_GENES	0.1062	0.0257353
SAMOLS_TARGETS_OF_KHSV_MIRNAS_UP	0.106171	0.0257755
NAGASHIMA_NRG1_SIGNALING_DN	0.106135	0.0258273
MARKS_HDAC_TARGETS_UP	0.105823	0.0262679
FLORIO_NEOCORTEX_BASAL_RADIAL_GLIA_UP	0.105765	0.026352
REACTOME_AMINE_LIGAND_BINDING_RECEPTORS	0.105699	0.0264459
KEGG_PROSTATE_CANCER	0.105647	0.0265203
BIOCARTA_CARM_ER_PATHWAY	0.105614	0.0265683
REACTOME_NRIF_SIGNALS_CELL_DEATH_FROM_THE_NUCLEUS	0.105581	0.0266151
PHONG_TNF_RESPONSE_VIA_P38_PARTIAL	0.10558	0.0266169
TURASHVILI_BREAST_NORMAL_DUCTAL_VS_LOBULAR_DN	0.104982	0.0274915
KOKKINAKIS_METHIONINE_DEPRIVATION_48HR_UP	0.104948	0.0275425
REACTOME_ATF4_ACTIVATES_GENES_IN_RESPONSE_TO_ENDOPLASMIC_RETICULUM_STRESS	0.104814	0.0277422
BIOCARTA_FREE_PATHWAY	0.104793	0.0277742
FLECHNER_PBL_KIDNEY_TRANSPLANT_REJECTED_VS_OK_UP	0.104719	0.0278849
RIZKI_TUMOR_INVASIVENESS_2D_DN	0.104698	0.0279158
REACTOME_INSULIN_RECEPTOR_SIGNALLING_CASCADE	0.104691	0.027926
REACTOME_BASIGIN_INTERACTIONS	0.104645	0.0279961
SU_PLACENTA	0.104546	0.0281456
PID_RB_1PATHWAY	0.103908	0.0291254
MATZUK_OVULATION	0.103846	0.0292216
REACTOME_NETRIN_MEDIATED_REPULSION_SIGNALS	0.103828	0.0292507
MYLLYKANGAS_AMPLIFICATION_HOT_SPOT_22	0.103811	0.0292773
FRIDMAN_SENESCENCE_DN	0.103765	0.0293495
TAVAZOIE_METASTASIS	0.103716	0.0294258
CARDOSO_RESPONSE_TO_GAMMA_RADIATION_AND_3AB	0.103677	0.0294874
WANG_METHYLATED_IN_BREAST_CANCER	0.103649	0.029531
NAKAMURA_CANCER_MICROENVIRONMENT_UP	0.103391	0.0299417
BIOCARTA_TERC_PATHWAY	0.103378	0.029961
REACTOME_MITOCHONDRIAL_BIOGENESIS	0.103083	0.0304369
DORN_ADENOVIRUS_INFECTION_48HR_UP	0.103021	0.0305369
REACTOME_INTERLEUKIN_1_FAMILY_SIGNALING	0.103015	0.0305457
PID_EPHA2_FWD_PATHWAY	0.102838	0.0308357
FORTSCHEGGER_PHF8_TARGETS_DN	0.102742	0.030993
LIM_MAMMARY_LUMINAL_PROGENITOR_DN	0.102693	0.0310727
BROWNE_HCMV_INFECTION_20HR_DN	0.10269	0.0310776
REACTOME_MRNA_DECAY_BY_3_TO_5_EXORIBONUCLEASE	0.102536	0.0313334
GROSS_HYPOXIA_VIA_ELK3_ONLY_DN	0.102459	0.0314609
REACTOME_CITRIC_ACID_CYCLE_TCA_CYCLE	0.102415	0.0315348
DER_IFN_GAMMA_RESPONSE_DN	0.102411	0.0315399
GARGALOVIC_RESPONSE_TO_OXIDIZED_PHOSPHOLIPIDS_GREEN_UP	0.102402	0.0315558
DORN_ADENOVIRUS_INFECTION_32HR_UP	0.102398	0.0315629
REACTOME_ONCOGENE_INDUCED_SENESCENCE	0.102375	0.031601
SCHAEFFER_PROSTATE_DEVELOPMENT_AND_CANCER_BOX2_DN	0.102354	0.0316368
LANDIS_ERBB2_BREAST_PRENEOPLASTIC_UP	0.102342	0.0316562
BYSTRYKH_SCP2_QTL	0.102227	0.031849
BIOCARTA_MITR_PATHWAY	0.102189	0.0319128
REACTOME_INTERLEUKIN_36_PATHWAY	0.102182	0.0319242
HUTTMANN_B_CLL_POOR_SURVIVAL_DN	0.102121	0.032027
REACTOME_MACROAUTOPHAGY	0.102014	0.0322093
MATZUK_SPERMATID_DIFFERENTIATION	0.101648	0.0328365
HOWLIN_CITED1_TARGETS_1_DN	0.101554	0.0329988
REACTOME_POST_TRANSLATIONAL_MODIFICATION:_SYNTHESIS_OF_GPI_ANCHORED_PROTEINS	0.101443	0.0331916
REACTOME_PROCESSING_OF_SMDT1	0.101363	0.0333316
IRITANI_MAD1_TARGETS_DN	0.101333	0.0333849
REACTOME_ABC_FAMILY_PROTEINS_MEDIATED_TRANSPORT	0.101332	0.0333857
WEBER_METHYLATED_HCP_IN_FIBROBLAST_DN	0.101322	0.0334038
REACTOME_TIE2_SIGNALING	0.101238	0.0335514
BIOCARTA_FIBRINOLYSIS_PATHWAY	0.101234	0.0335587
DACOSTA_UV_RESPONSE_VIA_ERCC3_TTD_DN	0.101127	0.0337462
BIOCARTA_PS1_PATHWAY	0.101089	0.0338137
SCHAEFFER_SOX9_TARGETS_IN_PROSTATE_DEVELOPMENT_DN	0.101089	0.0338141
REACTOME_MRNA_SPLICING	0.101049	0.0338845
SILIGAN_BOUND_BY_EWS_FLT1_FUSION	0.100983	0.0340016
KORKOLA_EMBRYONAL_CARCINOMA	0.100682	0.0345408
PID_MET_PATHWAY	0.100545	0.0347886
REACTOME_CD209_DC_SIGN_SIGNALING	0.100439	0.0349819
REACTOME_ACTIVATION_OF_AMPK_DOWNSTREAM_OF_NMDARS	0.10037	0.0351081
REACTOME_SUMOYLATION_OF_TRANSCRIPTION_COFACTORS	0.100369	0.0351091
REACTOME_FORMATION_OF_THE_BETA_CATENIN:TCF_TRANSACTIVATING_COMPLEX	0.100302	0.0352319
ELVIDGE_HYPOXIA_UP	0.100179	0.035458
BIOCARTA_NOTCH_PATHWAY	0.100142	0.0355276
SHAFFER_IRF4_TARGETS_IN_ACTIVATED_DENDRITIC_CELL	0.100095	0.0356132
YAO_TEMPORAL_RESPONSE_TO_PROGESTERONE_CLUSTER_5	0.100091	0.0356216
REACTOME_RECYCLING_PATHWAY_OF_L1	0.0999402	0.0359014
DASU_IL6_SIGNALING_SCAR_DN	0.0999365	0.0359082
KEGG_ALANINE_ASPARTATE_AND_GLUTAMATE_METABOLISM	0.0999216	0.035936
MYLLYKANGAS_AMPLIFICATION_HOT_SPOT_9	0.0998028	0.0361583
HADDAD_T_LYMPHOCYTE_AND_NK_PROGENITOR_UP	0.099769	0.0362217
DURCHDEWALD_SKIN_CARCINOGENESIS_DN	0.0994703	0.0367861
MARSON_BOUND_BY_FOXP3_STIMULATED	0.0992985	0.0371144
NAKAYAMA_FRA2_TARGETS	0.0992609	0.0371865
LUCAS_HNF4A_TARGETS_DN	0.0992465	0.0372141
REACTOME_ASSEMBLY_AND_CELL_SURFACE_PRESENTATION_OF_NMDA_RECEPTORS	0.0992229	0.0372594
DORN_ADENOVIRUS_INFECTION_24HR_DN	0.0990866	0.0375224
REACTOME_RECEPTOR_MEDIATED_MITOPHAGY	0.0989771	0.0377348
REACTOME_DOWNSTREAM_SIGNALING_OF_ACTIVATED_FGFR2	0.098968	0.0377524
REACTOME_DOWNSTREAM_SIGNALING_OF_ACTIVATED_FGFR3	0.0985381	0.0385965
REACTOME_TRANSPORT_TO_THE_GOLGI_AND_SUBSEQUENT_MODIFICATION	0.0984802	0.0387114
REACTOME_METABOLISM_OF_VITAMINS_AND_COFACTORS	0.0983823	0.0389064
SMID_BREAST_CANCER_RELAPSE_IN_LIVER_UP	0.0983227	0.0390253
REACTOME_TRISTETRAPROLIN_TTP_ZFP36_BINDS_AND_DESTABILIZES_MRNA	0.0982769	0.0391171
REACTOME_NOTCH3_ACTIVATION_AND_TRANSMISSION_OF_SIGNAL_TO_THE_NUCLEUS	0.0979484	0.0397801
YOKOE_CANCER_TESTIS_ANTIGENS	0.0979346	0.0398083
REACTOME_ATTENUATION_PHASE	0.0979299	0.0398178
HORTON_SREBF_TARGETS	0.0976572	0.040376
REACTOME_NOTCH2_ACTIVATION_AND_TRANSMISSION_OF_SIGNAL_TO_THE_NUCLEUS	0.0975545	0.0405878
RICKMAN_TUMOR_DIFFERENTIATED_WELL_VS_POORLY_DN	0.0975454	0.0406066
GAUSSMANN_MLL_AF4_FUSION_TARGETS_B_UP	0.0975231	0.0406527
IVANOVA_HEMATOPOIESIS_INTERMEDIATE_PROGENITOR	0.0975049	0.0406904
WAGNER_APO2_SENSITIVITY	0.0974499	0.0408046
BIOCARTA_IGF1R_PATHWAY	0.0973402	0.0410329
ZHONG_RESPONSE_TO_AZACITIDINE_AND_TSA_DN	0.0973317	0.0410507
REACTOME_HIGHLY_SODIUM_PERMEABLE_ACETYLCHOLINE_NICOTINIC_RECEPTORS	0.0971595	0.0414116
REACTOME_RUNX2_REGULATES_CHONDROCYTE_MATURATION	0.0970871	0.041564
MARIADASON_RESPONSE_TO_BUTYRATE_SULINDAC_6	0.0970214	0.0417029
GEISS_RESPONSE_TO_DSRNA_DN	0.0969056	0.0419484
KYNG_WERNER_SYNDROM_UP	0.0969005	0.0419592
KIM_WT1_TARGETS_UP	0.0968993	0.0419618
REACTOME_SIGNALING_BY_TYPE_1_INSULIN_LIKE_GROWTH_FACTOR_1_RECEPTOR_IGF1R	0.0967629	0.0422528
ALCALAY_AML_BY_NPM1_LOCALIZATION_UP	0.0966838	0.0424224
LEI_MYB_TARGETS	0.0965514	0.0427072
REACTOME_ADP_SIGNALLING_THROUGH_P2Y_PURINOCEPTOR_1	0.0963745	0.0430906
REACTOME_SIGNALING_BY_ROBO_RECEPTORS	0.0963444	0.0431561
REACTOME_SMALL_INTERFERING_RNA_SIRNA_BIOGENESIS	0.0962935	0.0432671
NIKOLSKY_BREAST_CANCER_10Q22_AMPLICON	0.0960932	0.0437059
GRUETZMANN_PANCREATIC_CANCER_UP	0.0960746	0.0437469
ITO_PTTG1_TARGETS_UP	0.0959223	0.0440836
NIKOLSKY_BREAST_CANCER_12Q13_Q21_AMPLICON	0.0957672	0.0444284
GUO_HEX_TARGETS_UP	0.0956407	0.0447116
FIGUEROA_AML_METHYLATION_CLUSTER_1_UP	0.0956215	0.0447548
ZHENG_FOXP3_TARGETS_DN	0.095609	0.0447827
ONDER_CDH1_TARGETS_3_DN	0.0955968	0.0448101
KEGG_NON_SMALL_CELL_LUNG_CANCER	0.0955334	0.0449529
REACTOME_ERKS_ARE_INACTIVATED	0.0954175	0.0452147
REACTOME_TFAP2_AP_2_FAMILY_REGULATES_TRANSCRIPTION_OF_GROWTH_FACTORS_AND_THEIR_RECEPTORS	0.0953929	0.0452705
REACTOME_PYRUVATE_METABOLISM_AND_CITRIC_ACID_TCA_CYCLE	0.0953399	0.0453906
REACTOME_IRS_MEDIATED_SIGNALLING	0.0953362	0.045399
PID_IGF1_PATHWAY	0.0952273	0.0456472
DACOSTA_ERCC3_ALLELE_XPCS_VS_TTD_UP	0.0952224	0.0456583
REACTOME_ACTIVATION_OF_NOXA_AND_TRANSLOCATION_TO_MITOCHONDRIA	0.0951464	0.045832
SANA_RESPONSE_TO_IFNG_DN	0.0950873	0.0459677
HAHTOLA_MYCOSIS_FUNGOIDES_CD4_UP	0.0950582	0.0460345
REACTOME_MET_INTERACTS_WITH_TNS_PROTEINS	0.094977	0.0462215
KEGG_N_GLYCAN_BIOSYNTHESIS	0.0949745	0.0462274
VANOEVELEN_MYOGENESIS_SIN3A_TARGETS	0.0949301	0.0463298
WILLIAMS_ESR2_TARGETS_DN	0.0949195	0.0463545
KEGG_GLYCOSPHINGOLIPID_BIOSYNTHESIS_GLOBO_SERIES	0.0948908	0.0464208
GALLUZZI_PERMEABILIZE_MITOCHONDRIA	0.0945914	0.0471184
MASRI_RESISTANCE_TO_TAMOXIFEN_AND_AROMATASE_INHIBITORS_DN	0.094537	0.047246
BREDEMEYER_RAG_SIGNALING_VIA_ATM_NOT_VIA_NFKB_UP	0.0942678	0.0478822
STEIN_ESRRA_TARGETS	0.0942451	0.047936
BIOCARTA_CDC42RAC_PATHWAY	0.0942396	0.0479492
REACTOME_INLB_MEDIATED_ENTRY_OF_LISTERIA_MONOCYTOGENES_INTO_HOST_CELL	0.0941753	0.0481023
PID_RANBP2_PATHWAY	0.0941313	0.0482073
KEGG_ADIPOCYTOKINE_SIGNALING_PATHWAY	0.0941003	0.0482816
THUM_MIR21_TARGETS_HEART_DISEASE_DN	0.0940594	0.0483795
ROESSLER_LIVER_CANCER_METASTASIS_UP	0.0938236	0.0489476
PLASARI_NFIC_TARGETS_BASAL_UP	0.0938139	0.0489708
PID_NCADHERIN_PATHWAY	0.0936189	0.0494452
WU_HBX_TARGETS_1_UP	0.0934868	0.0497685
BROWNE_HCMV_INFECTION_12HR_UP	0.0933949	0.0499945
